# Supplementary material
Source: publisher figshare collection journal article supplement (https://acs.figshare.com/ndownloader/files/10676494)
Supplement: Supplementary file 1 [file 10676494]

## Supporting information

### Metabolic Engineering-Based Rapid Characterization of a Sesquiterpene Cyclase and the Skeletons of Fusariumdiene and Fusagramineol from *Fusarium graminearum*

Guangkai Bian<sup>†#</sup>, Anwei Hou<sup>†#</sup>, Yujie Yuan<sup>†</sup>, Ben Hu<sup>†</sup>, Shu Cheng<sup>†</sup>, Ziling Ye<sup>‡</sup>,  
Yingtong Di<sup>§||</sup>, Zixin Deng<sup>†,||</sup>, Tiangang Liu<sup>†,||\*</sup>

<sup>†</sup>Key Laboratory of Combinatorial Biosynthesis and Drug Discovery, Ministry of Education and School of Pharmaceutical Sciences, Wuhan University, Wuhan 430071, P. R. China.

<sup>‡</sup>J1 Biotech Co., Ltd., Wuhan 430075, P. R. China.

<sup>§</sup>State Key Laboratory of Phytochemistry and Plant Resources in West China, Kunming Institute of Botany, Chinese Academy of Sciences, Kunming 650204, P. R. China.

<sup>||</sup>Hubei Engineering Laboratory for Synthetic Microbiology, Wuhan Institute of Biotechnology, Wuhan 430075, P. R. China

|    |                                                                             |         |
|----|-----------------------------------------------------------------------------|---------|
| 17 | <b>Table of Contents</b>                                                    |         |
| 18 | Supplementary Materials and Methods                                         | S3-S10  |
| 19 | Supplementary References                                                    | S11     |
| 20 | Figures S1-S19                                                              | S12-S36 |
| 21 | Tables S1-S9                                                                | S37-S45 |
| 22 | Coordinates and detailed data for quantum chemical calculations of <b>1</b> | S46-S48 |
| 23 |                                                                             |         |

## Supplementary Materials and Methods

### Strains and media

*E. coli* BL21 (DE3) *F dcm ompT hsdSB(rB<sup>-</sup>mB<sup>-</sup>)gal* was obtained from Invitrogen (Carlsbad, CA, USA). *S. cerevisiae* CEN.PK2-1D (European *Saccharomyces cerevisiae* archive for functional analysis [EUROSCARF] accession number: 30000B) was purchased from EUROSCARF (Oberuresel, Germany) and cultivated in YPD medium. *F. graminearum* J1-012 was isolated from *Taxus chinensis* and cultivated in PDA medium. Whole genome sequencing and analysis of *F. graminearum* J1-012 is described in our previous work.<sup>1</sup>

### Phylogenetic analysis of terpene synthases of genus *Fusarium* and *F. graminearum* J1-012

For genus *Fusarium*, multiple sequence alignment was performed using Muscle. Evolutionary analyses were conducted in MEGA7.<sup>2</sup> A phylogenetic tree was inferred using the maximum likelihood method based on the Jones-Taylor-Thornton (JTT) matrix-based model. This analysis involved seventy-eight amino acid sequences. All positions with less than 95% site coverage were eliminated. There were a total of 138 positions in the final dataset.

### Construction of plasmids and mutants

The primers used in this study are listed in Table S1. Strains and plasmids are summarized in Table S2. To construct the plasmid to express sufficient precursor IPP and DMAPP in *S. cerevisiae*, pZY141 was constructed according to the following procedure: the left and right homologous arms of *GAL1710* and the terminator *CPS1* were amplified from *S. cerevisiae* CENPK2-1D using the primer pairs P1/P2, P3/P4, and P5/P6, respectively; *TRP1* was amplified from pRS424 using primer pair P7/P8; *ACT1* and *tHMG1* were amplified from *S. cerevisiae* S288C using primer pairs P9/P10 and P11/P12,

respectively; the promoter *PGAL10-PGAL1* and the plasmid backbone were amplified from *S. cerevisiae* CENPK2-1D and pRS426 using primer pairs P13/P14 and P15/P16, respectively. Then, *TRP1*, *ACT1*, and the left homologous arm of *GAL1710* were assembled using splicing by overlap extension PCR (SOE-PCR)<sup>3</sup> using the primer pair P1/P10; *tHMG1*, *PGAL10-PGAL1*, and *CPS1* were assembled by the same method using the primer pair P11/P6. Finally, the assembled fragments, together with the amplified backbone of pRS426 and the right homologous arm of *GAL1710*, were assembled using the yeast assembly method to generate the final plasmid pZY141.

To overexpress FgFS in *E. coli*, the coding sequence of *FgJ03939* was amplified from the cDNA library of *F. graminearum* using primer pair P17/P18, and then the fragment was subcloned into pET28a to generate pGB152. To verify the function of FgFS in *S. cerevisiae*, pGB315 was constructed according to the following procedure: *FgJ03939* was amplified from pGB152 using primer pair P19/P20; *ERG20* was amplified from *S. cerevisiae* CENPK2-1D using primer pair P21/P22; *PGAL1-GAL10* was amplified from pZY141 using primer pair P23/P24; and the plasmid backbone was amplified from pXL144 (constructed by Xiaowei Li, unpublished data) using primer pair P25/P26. Finally, the above amplified fragments were assembled using the Gibson method to generate pGB315.<sup>4</sup>

Plasmid pZY141 was linearized and inserted into the *GAL1710* site of *S. cerevisiae* CENPK2-1D to generate the mutant *S. cerevisiae* ZY141. Thereafter, pGB315 with the downstream sesquiterpene-forming pathway was linearized and inserted into the *HIS3* site of *S. cerevisiae* ZY141 to generate *S. cerevisiae* T16.

## **Protein expression and purification**

Plasmid pGB315 was transformed into *E. coli* BL21 (DE3) and cultivated in 2-L flasks containing 1 L LB medium at 37 °C with 50 mg/L kanamycin (KAN). When the OD<sub>600</sub> reached 0.6–0.8, 0.1 mM IPTG was added to the cultures, which were then cultivated for an additional 6 h at 28 °C. The cells were harvested and resuspended in 40 mL buffer A

(50 mM Tris-Cl, 300 mM NaCl, 4 mM  $\beta$ -mercaptoethanol, pH 7.6). Cell disruption was performed using a high-pressure homogenizer and centrifuged at  $30,000 \times g$  for 1 h. A Biologic DuoFlow Chromatography System (Bio-Rad Laboratories, Hercules, CA, USA) was used for protein purification. His-tagged proteins were purified by Ni-NTA affinity chromatography (GE Healthcare, Little Chalfont, UK), anion exchange resin (HiTrap Q FF; GE Healthcare), and gel filtration chromatography (HiPrep 16/60 Sephacryl S-200 HR; GE Healthcare). The purified protein (Figure S4) was then concentrated and preserved in 50 mM Tris buffer (50 mM Tris, 10% glycerol). The protein concentration was measured using a Pierce1 BCA protein assay kit (Thermo Fisher Scientific, Waltham, MA, USA) and recorded on an Enspire Multimode Plate Reader (PerkinElmer, Waltham, MA, USA).

#### ***In vitro* assays and kinetic measurements**

To test the terpene synthase activity of FgFS, an *in vitro* assay was carried out as previously described.<sup>1</sup> Reactions were carried out using 10  $\mu$ M FgFS, 100  $\mu$ M substrates (GPP, FPP, or GGPP), and 2 mM  $Mg^{2+}$  in 200  $\mu$ L 50 mM Tris-HCl buffer (pH 7.6) with 10% glycerol at 30 °C overnight. The products were extracted with an equal volume of hexane and then detected and analyzed by GC/MS (Figure S6, S7). For steady-state kinetics, 100- $\mu$ L scale reactions were carried out in 50 mM Tris-HCl buffer (pH 7.6) with 10% glycerol and 50  $\mu$ L pyrophosphate reagent. Reactions were carried out with 1 mg/mL FgFS, 2 mM  $Mg^{2+}$ , and 1–200 mM substrates (GPP, FPP, and GGPP). Product assays were carried out by measuring the release of pyrophosphate (PPi), which was recorded using an Enspire Multimode Plate Reader, as previously described (Table S3).<sup>5</sup>

#### **Expression and functional characterization of FgFS in *S. cerevisiae***

*S. cerevisiae* T16 was cultivated in YPD media in a shake flask and then inoculated into a 5-L fermenter with 2.5 L YPD at 30 °C. A two-stage feeding process was adopted in this fed-batch fermentation. First, 1.5-L feeding solution with 10 g/L yeast extract and 500 g/L glucose was used to sustain rapid cell growth. When the cells reached the stable

phase, 1% galactose was added to the fermenter to induce the production of sesquiterpenes. Ethanol (feeding solution II) was used as carbon source to meet the needs of cell metabolism. The isotopic labeling experiment was carried out in a 5-L fermenter with 2 L YPD. Feeding solution II was replaced with 50 g/L glucose, 450 g/L sodium acetate, and 1% [1-<sup>13</sup>C,2-<sup>2</sup>H<sub>3</sub>] - sodium acetate. The pH was controlled at 6.0 to maintain an acidic environment for normal metabolism. Cell growth and the accumulation of sesquiterpenes were monitored through the fermentation process.

#### **Compound isolation and structure elucidation**

The sesquiterpenes were isolated from the hexane-extracted layer of the fermentation broth and cells of *S. cerevisiae* T16 (200 mL) using XBridge<sup>TM</sup> Prep C18 column (Waters, 10 × 250 mm, 5 μm) and prep-HPLC system with acetonitrile and water as the mobile phase. The first round isolation was carried out according to the following procedure: flow rate, 2.5 mL/min; in the first 85 min, the proportion of acetonitrile was increased using a linear gradient from 20% to 90%; the proportion of acetonitrile was then increased to 100% over 1 min and maintained for 10 min; finally, the proportion of acetonitrile was decreased to 20% and maintained for 10 min. Compound **1** was isolated with a retention time of 95.2 min (5.6 mg). Compound **4** was isolated with a retention time of 72.4 min (14.2 mg). Compound **6** was isolated with a retention time of 92.4 min (1.5 mg). Compound **8** was isolated with a retention time of 95.2 min (2.3 mg). Compound **2**, **3**, **5** and **7** were located in the F1 to F4 fractions with retention times of 61.3–64.8 min, 65.5–67.3 min, 70.4–72.0 min and 69.9–70.9 min, respectively. Thereafter, compound **2** (25.7 mg), with a retention time of 46.8 min, was isolated from F1 using 75% acetonitrile as the mobile phase at a rate of 0.75 mL/min. Compound **3** (40.3 mg), with a retention time of 25.7 min, was isolated from F2 using 70% acetonitrile as the mobile phase at a rate of 2 mL/min. Compound **5** (11.3 mg), with a retention time of 36.5 min, was isolated from F3 using 92% acetonitrile as the mobile phase at a rate of 0.6 mL/min. Compound **7** (2.1 mg), with a retention time of 33.2 min, was isolated from

F4 using 96% acetonitrile as the mobile phase at a rate of 0.6 mL/min.  $^1\text{H}$  NMR and  $^{13}\text{C}$  NMR were performed on an Agilent 400 MHz or 600 MHz instrument (DirectDrive2; Santa Clara, CA, USA).

Compound **1**. Colorless oil.  $[\alpha]_{\text{D}}^{22} = -13.8$  ( $c$  0.4,  $\text{CHCl}_3$ ). For NMR data, see Table S4 and Figure S8. HRMS (ESI) calculated for  $\text{C}_{15}\text{H}_{23} [\text{M-H}]^+$ :  $m/z$  203.1794;  $m/z$  found: 203.1792.

Compound **2**. White solid.  $[\alpha]_{\text{D}}^{22} = -45.6$  ( $c$  0.26,  $\text{CHCl}_3$ ). For NMR data see Table S5 and Figure S9. HRMS (ESI) calculated for  $\text{C}_{15}\text{H}_{25} [\text{M-OH}]^+$ :  $m/z$  205.1951;  $m/z$  found: 205.1950.

Compound **3**. White solid.  $[\alpha]_{\text{D}}^{22} = -72.3$  ( $c$  0.25,  $\text{CHCl}_3$ ). For NMR data see Tables S6 and Figure S10. HRMS (ESI) calculated for  $\text{C}_{15}\text{H}_{25} [\text{M-OH}]^+$ :  $m/z$  205.1951;  $m/z$  found: 205.1951.

Compound **4** was identified as nerolidol. Colorless oil.  $[\alpha]_{\text{D}}^{22} = 20.1$  ( $c$  0.04, benzene).  $^1\text{H}$  NMR (400 MHz,  $\text{CDCl}_3$ )  $\delta$  [ppm] = 5.92 (dd,  $J = 17.3, 10.8$  Hz, 1H), 5.21 (dd,  $J = 17.3, 1.3$  Hz, 1H), 5.14 (tt,  $J = 5.8, 1.3$  Hz, 1H), 5.11 – 5.06 (m, 1H), 5.06 (dd,  $J = 10.8, 1.3$  Hz, 1H), 2.11 – 2.01 (m, 4H), 2.00 – 1.96 (m, 2H), 1.68 (s, 3H), 1.60 (d,  $J = 1.2$  Hz, 6H), 1.60 (d,  $J = 9.5$  Hz, 2H), 1.28 (s, 3H) (Figure S11a).  $^{13}\text{C}$  NMR (101 MHz,  $\text{CDCl}_3$ )  $\delta$  [ppm] = 145.0, 135.5, 131.4, 124.1, 124.1, 111.6, 73.5, 41.9, 39.6, 27.8, 26.6, 25.6, 22.6, 17.6, 15.9 (Figure S11b). HRMS (ESI) calculated for  $\text{C}_{15}\text{H}_{25} [\text{M-OH}]^+$ :  $m/z$  205.1951;  $m/z$  found: 205.1940. These data were the same as previously reported.<sup>1, 6</sup>

Compound **5** was identified as (-)- $\alpha$ -acorenol. Colorless oil.  $[\alpha]_{\text{D}}^{22} = -30.7$  ( $c$  0.07,  $\text{CHCl}_3$ ).  $^1\text{H}$  NMR (400 MHz,  $\text{CDCl}_3$ )  $\delta$  [ppm] = 5.45 – 5.39 (m, 1H), 2.40 – 2.30 (m, 1H), 2.03 – 1.90 (m, 3H), 1.89 – 1.85 (m, 2H), 1.85 – 1.80 (m, 1H), 1.80 – 1.70 (m, 1H), 1.67 – 1.64 (m, 3H), 1.55 – 1.45 (m, 2H), 1.43 – 1.35 (m, 1H), 1.26 – 1.24 (m, 1H), 1.21 (s, 3H), 1.21 (s, 3H), 0.85 (d,  $J = 6.8$  Hz, 3H) (Figure S12a).  $^{13}\text{C}$  NMR (101 MHz,  $\text{CDCl}_3$ )  $\delta$  [ppm] = 135.2, 121.2, 73.7, 54.7, 45.0, 41.7, 31.5, 30.6, 30.1, 29.0, 27.9, 27.8, 26.1, 23.3,

14.9 (Figure S12b). HRMS (ESI) calculated for  $C_{15}H_{25}O [M]^+$ :  $m/z$  221.1900;  $m/z$  found: 221.1897. These data were the same as previously reported.<sup>7</sup>

Compound **6** was identified as (*E*)- $\beta$ -farnesene. Colorless oil.  $^1H$  NMR (400 MHz,  $CDCl_3$ )  $\delta$  [ppm] = 6.3 (dd,  $J$  = 17.6, 10.8 Hz, 1H), 5.2 (dd,  $J$  = 17.6, 1.1 Hz, 1H), 5.1 – 5.0 (m, 2H), 5.0 – 4.9 (m, 3H), 2.2 – 2.1 (m, 3H), 2.1 – 1.9 (m, 5H), 1.6 (d,  $J$  = 1.5 Hz, 3H), 1.6 (d,  $J$  = 1.5 Hz, 6H) (Figure S13a).  $^{13}C$  NMR (101 MHz,  $CDCl_3$ )  $\delta$  [ppm] = 146.0, 138.9, 135.3, 131.3, 124.3, 123.9, 115.7, 113.0, 39.6, 31.3, 26.6, 26.5, 25.7, 17.6, 16.0 (Figure S13b). HRMS (ESI) calculated for  $C_{15}H_{24} [M]^+$ :  $m/z$  204.1873;  $m/z$  found: 204.1869. These data were the same as previously reported.<sup>8</sup>

Compound **7** was identified as (+)- $\alpha$ -bisabolol. Colorless oil.  $[\alpha]_D^{22}$  = 51.3 ( $c$  0.06,  $CHCl_3$ ).  $^{13}C$  NMR (101 MHz,  $CDCl_3$ )  $\delta$  [ppm] = 134.1, 131.7, 124.4, 120.4, 74.2, 42.8, 40.0, 30.9, 26.8, 25.6, 23.3, 23.2, 23.1, 21.9, 17.6 (Figure S14). HRMS (ESI) calculated for  $C_{15}H_{25}O [M]^+$ :  $m/z$  221.1900;  $m/z$  found: 221.1898. These data were the same as those previously reported findings.<sup>9</sup>

Compound **8** was identified as (-)-acoradiene.<sup>10</sup> Colorless oil.  $[\alpha]_D^{22}$  = -24.2 ( $c$  0.06,  $CHCl_3$ ). The molecular formula was determined as  $C_{15}H_{26}O$  by HR-ESI-MS at  $m/z$  204.1873  $[M]^+$  (calcd 204.1873). Our  $^1H$ -NMR data revealed the existence of one singlet methyl (Me-12), three doublet methyls (Me-13, Me-14 and Me-15), and two olefinic methines (H-2, H-9) (Table S7 and Figure S15b). The  $^{13}C$ -NMR and HSQC spectra confirmed the presence of fifteen carbon atoms, which were assigned as one  $sp^3$  quaternary carbon (C-6), two  $sp^2$  quaternary carbons (C-3, C-10), two olefinic methines, two aliphatic methines, four aliphatic methylenes, and four methyls. These data designated the bicyclic skeleton for compound **8**. Our  $^1H$ - $^1H$  COSY experiments then revealed spin systems of H-1/H-2, H-4/H-5, H-13/H-7/H-8/H-9, and H-14/H-11/H-15 (Figure S15a and 15e). Additionally, HMBC from the methyl signals were observed as follows: Me-12 to C-2, C-3, and C-4; Me-13 to C-6, C-7, and C-8; Me-14 to C-10, C-11, and C-15; and Me-15 to C-10, C-11, and C-14. Furthermore, the HMBC spectra showed



correlations between H-5 and C-1, C-6 and C-7, between H-9 and C-6 and C-7, and between H-11 and C-9 (Figure S15a and 15f). Thus, the planar structure of compound **8** was identified as a 5/6-membered spirocyclic sesquiterpene.

#### **Calculation of optical rotation**

All quantum-chemical calculations were performed using the Gaussian 03 program. The optical rotation calculations were calculated using the b3lyp/aug-cc-pvdz method under the Self-Consistent Reaction Field model of solvent (CHCl<sub>3</sub>).

#### **Energy minimization and optical rotation calculations**

The initial conformational distribution search was performed using the MMFF94 method overlaid with key correlations observed in the NOESY spectra of **1**. The corresponding minimum geometries were preoptimized at the HF/6-31G level in Gaussian 03 program package,<sup>11</sup> which was further checked by frequency calculations; no imaginary frequencies were found. Their minimum geometries were further optimized by DFT calculation B3LYP at the b3lyp/aug-cc-pvdz level in the gas phase. ECD calculations were performed on the obtained stable conformers by TDDFT [b3lyp/aug-cc-pvdz] under the Self-Consistent Reaction Field model of solvent (CHCl<sub>3</sub>). The overall predicted specific rotation value of **1** was subsequently compared with that of the experimental one.

#### **The cDNA sequence of FgFS:**

```
ATGCCTCACAAGCACGTTCTTAGACCAGTCAAGTTGACATTTGATCCTGTAGGATCA
AACACCCTAGGTGTGCCAACCTTGACTTTGAGTCTCTGTTCCGGAAGACAGCGTCTCT
GAGGATGCCCCTCTTGTTATCTACCCAGAGGATATGGGTGTCCCATGGAACACCTCTCTT
CCTTGACCAGACAATCCAAGTTCTGGGCTTACGCCGAGGCAGCTGGATATGAAATGGCC
AACGGAATCAGCCTTGACAAGGCATCAGAGCGTGGCACACTACCCATGGAGTTGATGGA
TGAGCGTCGCAAGTGGAAGATTGATGAGCTAGTTGAGGATGCCATCTCTTGCTGTGCTTA
TCTTTACCCTACATCATCTCCTACCAGATTGGCGTTGTTGACCCAGTCTGTTCTGCTTCTAT
```

209 TCCTCCACGACGATGTTATTGAGCGAGGAGCTACTCAAAACGAAACCACAGTGGTAGAC  
210 GAATTTCTTAGCATGGCTCCCAAGAACAGGCATCTTAAGAAATTCTGGTCAGACGTATTG  
211 GAATGTGATCCCGTCCTTGGACCTGATCTGCTTTATGCTATCCATGCTTTCGTCCGTGATG  
212 GTCGTGTAAAGTCACCCTTTAAGCAGGATCACTATGCCACATTGGCTGATTACATGCTTT  
213 ACCGTCGCAATGATGTTGGCAAGACATTTATGATTGCAGCTATCCGCTTCGGCTCTGGCG  
214 TGCAACAAACACGCGAAGAACTTGCTCCCTTTGACGAGCTTGCTGATCTTTACGTCAGAC  
215 ACTCAATTCTTATCAACGATCTCTACTCGTATGATAAGGAGGTGCACGAGGTCAAGACTA  
216 TCGACGCGTCCATCGTGAACGCAGTTGCTGTACAGAGCAGCTCCTTTCCGTGTCGCCTG  
217 ACCTGGCCAAGAACTTAACCAGAGCTATTACCTTTGACATGGAGAAGGAGTTTTACGGCA  
218 TTTGTGAGAAGTTTATGCACAGCCCTGATATCAACGATCGCCAGCGCGTGTCGTTACTG  
219 CGCTCTTTGATGCGTTGACAGGCAATATCTTCCATTCTGCTACTTTGAGCAGATACGTTTCG  
220 TCACGGCGAGAGACCACTTCCTTGCAAGTGTTAG

221

222

## References:

- (1) Bian, G.; Han, Y.; Hou, A.; Yuan, Y.; Liu, X.; Deng, Z.; Liu, T. *Metab. Eng.* **2017**, *42*, 1-8.
- (2) Kumar, S.; Stecher, G.; Tamura, K. *Mol. Biol. Evol.* **2016**, *33* (7), 1870-1874.
- (3) Shevchuk, N. A.; Bryksin, A. V.; Nusinovich, Y. A.; Cabello, F. C.; Sutherland, M.; Ladisch, S. *Nucleic Acids Res.* **2004**, *32* (2), e19.
- (4) Gibson, D. G.; Young, L.; Chuang, R. Y.; Venter, J. C.; Hutchison, C. A.; Smith, H. O. *Nat. Methods* **2009**, *6* (5), 343-345.
- (5) Agger, S. A.; Lopez-Gallego, F.; Hoye, T. R.; Schmidt-Dannert, C. *J. Bacteriol.* **2008**, *190* (18), 6084-6096.
- (6) Doskotch, R.; Cheng, H.-Y.; Odell, T.; Girard, L. *J. Chem. Ecol.* **1980**, *6* (4), 845-851.
- (7) Brock, N. L.; Huss, K.; Tudzynski, B.; Dickschat, J. S. *Chembiochem.* **2013**, *14* (3), 311-5.
- (8) Simionatto, E.; Porto, C.; Stüker, C. Z.; Dalcol, I. I.; Silva, U. F. d. *Quim. Nova* **2007**, *30* (8), 1923-1925.
- (9) (a) Miyazawa, M.; Nankai, H.; Kameoka, H. *Phytochemistry* **1995**, *39* (5), 1077-1080; (b) Günther, K.; Carle, R.; Fleischhauer, I.; Merget, S. *Fresenius J. Anal. Chem.* **1993**, *345* (12), 787-790.
- (10) Marx, J. N.; Norman, L. R. *J. Org. Chem.* **1975**, *40* (11), 1602-1606.
- (11) Frisch, M.; Trucks, G.; Schlegel, H.; Scuseria, G.; Robb, M.; Cheeseman, J.; Montgomery Jr, J.; Vreven, T.; Kudin, K.; Burant, J., gaussian 03, Gaussian. Inc.: Wallingford, CT **2004**.

247

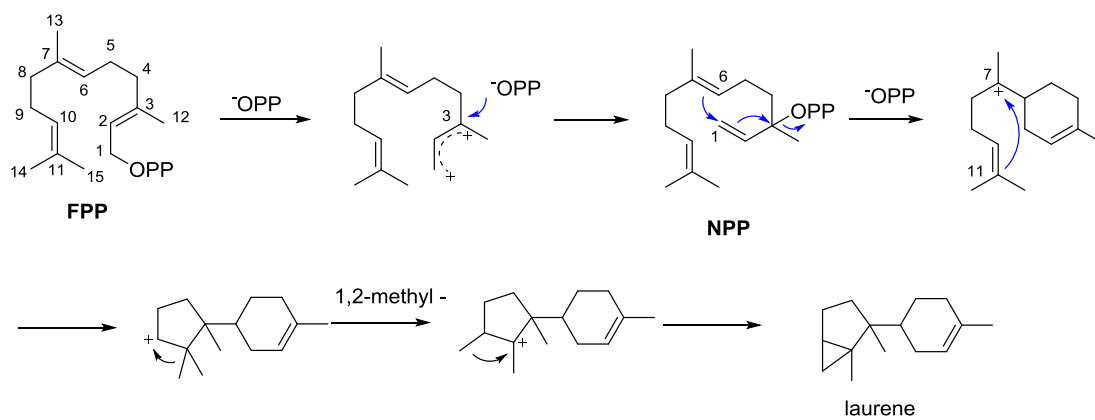

248

249 **Figure S1.** The skeleton produced by 1,6-cyclization of FPP upon isomerization to  
 250 nerolidyl pyrophosphate (NPP).

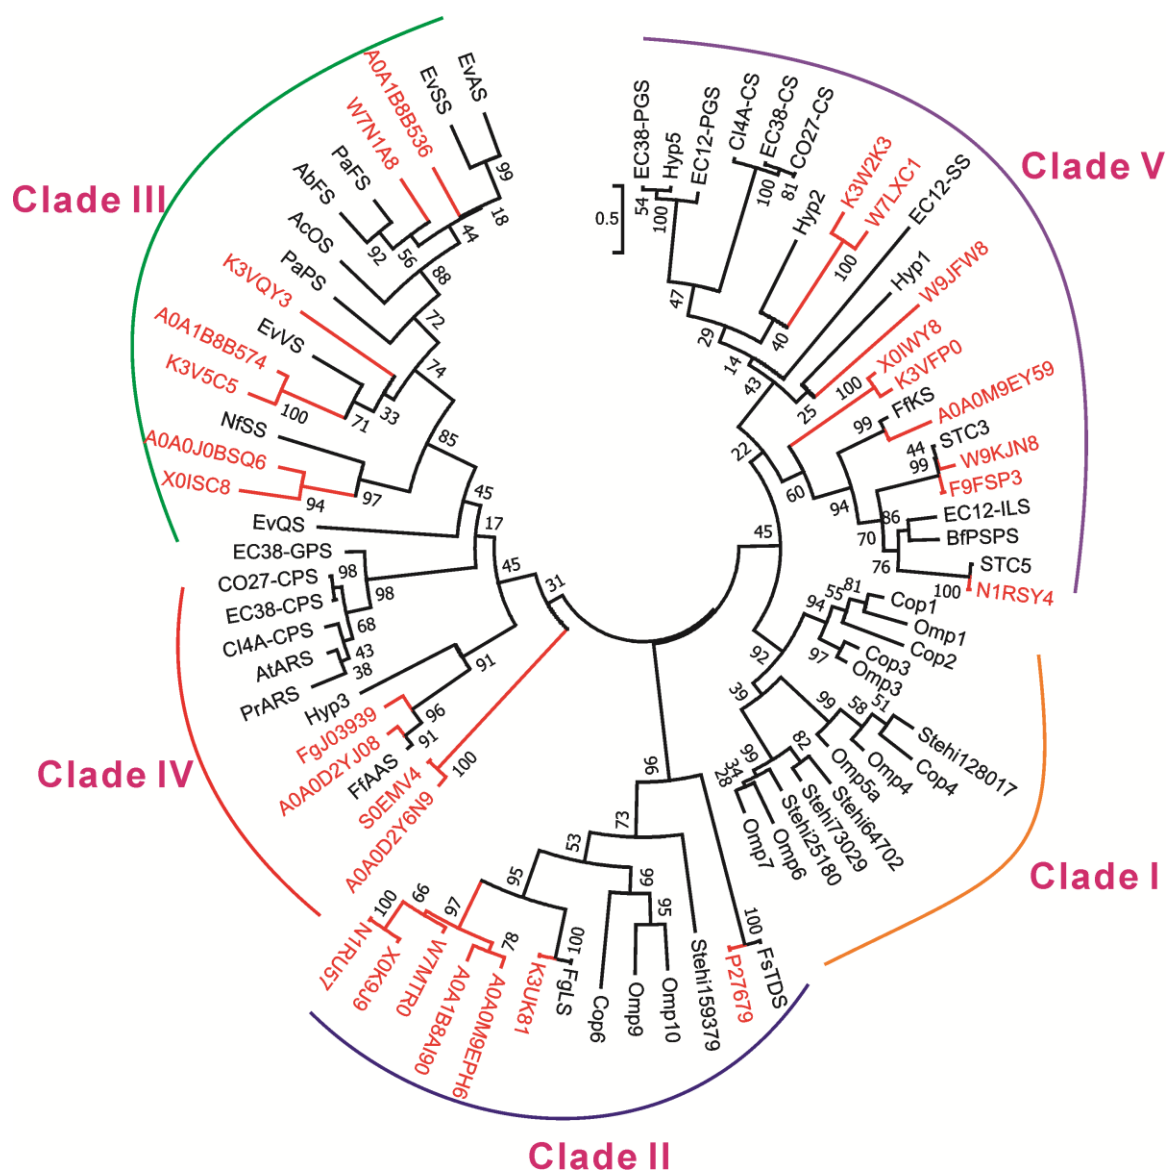

252

253 **Figure S2.** Phylogenetic tree of class I terpene synthases in genus *Fusarium*.

254 Branches marked in red represent the terpene synthases from genus *Fusarium*. Branches  
 255 for identified terpene synthases of filamentous fungi are marked in black. Branch length  
 256 indicates the number of substitutions per site. Branches are labeled with the percentage  
 257 base on 1, 000 bootstrap replicates.



FgJ03939 -----MPHKHVLPRPVKLTDPVGSNTLGVPTLD---FESLFREDSVSEDAPLVYFEDMGVPWNTSLPW-TRQSKFWAYAEAAQYE 78  
 CO27-CPS -----MAPMAEEVSP-----NQGHAKPVATPMRAVHPSSE---WTAQIHP-LHEK---VIAEVQGYF 55  
 EC38-CPS -----MAPVVEEYPTSP-----TQDYAKPVATPQRAVHPSSE---WTAQIHP-LHEK---VIAEVQGYF 55  
 C4A-CPS -----MSLAP-----SSG-----DYPSSH---WTPLIHP-LSEK---VTREVQGY 34  
 AtARS -----MKKPNQNTNGA-----SSS-----LEPPST---FQPLCHP-LVEE---VSKEVDGY 40  
 PrARS -----MATSTETISSLAQPFVHLENPI---NSPLVKETIRPRNDTTITPPPTQ---WSYLCHP-RVKE---VQDEVQGY 65  
 EC38-PGS MMRTTLLRLAQRTRRLRLSILFPHSLAAQEDQRAPEKASAQGLGCEALVLAQSDGKTFHLPDLWKVFSQDWPAAANPHAQRLDALVDS 90  
 Hyp3 -----MRPITCSFDPVGISFQTESKQENFEFLREAISRSVPGLENCNVDFRSLGVWPWTSFPA-AAQSKYWKDAEEAAAE 75  
 FfAAS -----MPHKDLPIRLVRAFDVPGDITLGPPLD---FASLFRERNVPEDAPLTLYFELNVPMWNTSLPW-TRQSKWVQGEAAAE 78  
  
 FgJ03939 MANGISLDKASERGTLPMELMD-ERRKWKIDELVEDAISCAYLYPTSSPTRLALLTQSULLLFLHDDVIER--GATONETTVDDEFISM 165  
 CO27-CPS LQHWPFPESEKTRKKKEVAGFS-----RVTCLYFPKALDDRIHFACRLTLTLFLVDDILEH--MSLEDGRAYNERLMPL 126  
 EC38-CPS LQHWPFPESEKTRKKKEVAGFS-----RVTCLYFPKALDDRIHFACRLTLTLFLVDDILEH--MSLEDGRAYNERLMPL 126  
 C4A-CPS LQHWPFPESEKTRKKKEVAGFS-----RVTCLYFPKALDDRIHFACRLTLTLFLVDDILEH--MSLEDGRAYNERLMPL 105  
 AtARS LQHWPFPESEKTRKKKEVAGFS-----RVTCLYFPKALDDRIHFACRLTLTLFLVDDILEH--MSFEESGAYNEKLIP 111  
 PrARS LENWKFPSKAVRTELDAKFS-----EVTCLYFPKALDDRIHFACRLTLTLFLVDDILEH--MSFADGGEAYNEKLIP 136  
 EC38-PGS LLERIITNEKKLWALKQANFG-----RLISLWYPNAEWESEIAAAYSVWIEVWDEIDAGDTDSNDEELSRAYYQK 163  
 Hyp3 LMDQIVAAAPGEGSLPAELAVSDKKAAKRELLDTSVAPMMEFAPANAPRARIKANALLIFMHDDQCEY--QSVQS-TIDISALADT 162  
 FfAAS LYNRI SADKASERGA LPVEFMD-ERRKWKIDELVEDAVSCAVLYPSSPTRIELLTQALLLFFHDDVMER--GATQDDATVDDDFVTM 165  
  
 FgJ03939 APKNRH-----LKK-----FWSVLECDPVLGPDLLYAIHAFVRDGRVKSPPFKQDH--YATLADYMLYRND 225  
 CO27-CPS FRGSVL-----PDRSVPVEWISYDLWESMRAHDDRMADIIEPVFTFMWAQTDPARLTD---MGLQGYLEYRERD 193  
 EC38-CPS FRGSVL-----PDRSVPVEWISYDLWESMRAHDDRMADIIEPVFTFMWAQTDPARLTD---MGLQGYLEYRERD 193  
 C4A-CPS SRGDVL-----PDRSVPVEWISYDLWESMRAHDDRMADIIEPVFTFMWAQTDPARLTD---MGLQGYLEYRERD 172  
 AtARS SRGDVL-----PDRSVPVEWISYDLWESMRAHDDRMADIIEPVFTFMWAQTDPARLTD---MGLQGYLEYRERD 178  
 PrARS SRGDVL-----PDRSVPVEWISYDLWESMRAHDDRMADIIEPVFTFMWAQTDPARLTD---MGLQGYLEYRERD 203  
 EC38-PGS SLSTIHNLGLDLPVEDGQEPVYEDDESHPNMAFADVGRGMRTDRIQRERFYRELEHFMIVGVGEVHVRMRGSI PSVEKYIEIRSGS 253  
 Hyp3 STPNKG-----GADILWQNRIFKEFSEETNREDPVVGPQLQGLINWVEHTRKALPASMT--FRSFNEYIDYRIGD 231  
 FfAAS I PKNKH-----MKR-----YFAVELECDPILGPGLLRAIGLEFVNAGRKKSPPFKQDK--YATLAELYDYRHD 225  
  
 FgJ03939 VGKTFMIAAIRFGSEVQQR--EELAPFDELADLYVRHSILNDLYSYDKEVHEVKTID--ASIVNAVAVTEQLLSVSPDLAKNLTRA 310  
 CO27-CPS VGKALLAALMRFSMALIVSP--SDLEMRVPVDRNGSKHLSVNDIWSYEKEVLAQAQTLHEEGMLCTAVAVLSKEAEISTDASKRVL 281  
 EC38-CPS VGKALLAALMRFSMALIVSP--SDLEMRVPVDRNGSKHLSVNDIWSYEKEVLAQAQTLHEEGMLCTAVAVLSKEAEISTDASKRVL 281  
 C4A-CPS VGKALLAALMRFSMALIVSP--EDLAIVRPIDFNGSRHLSVNDIWSYEKEVLAQAQTLHEEGMLCTAVAVLSKEAEISTDASKRVL 260  
 AtARS VGKALLAALMRFSMALIVSP--SELRQVREIDANGSKHLSVNDIWSYEKEVLAQAQTLHEEGMLCTAVAVLSKEAEISTDASKRVL 266  
 PrARS VGKALLAALMRFSMALIVSP--DELQDMKALEANGSKHLSVNDIWSYEKEVLAQAQTLHEEGMLCTAVAVLSKEAEISTDASKRVL 291  
 EC38-PGS VGCAQPIAITDAMLKIRLPESIMESAAMKALWRETVVICFIIINDVYSVQKEIAQGSLLN-LVPVYMKNCDEKQSLDVTTRDIEVL 342  
 Hyp3 FAVDFCDAAIILLTCEIFLTP--ADMEPLRLHRLYMTHTFSILNDLYSFNKEVVAEQETG--SAVINAVRVLEQLVDTSTRSAKVL 316  
 FfAAS IAKPFMIAAIRFGSEVQQR--EELAPFAELADLYVQHSILNDLYSYDKEVHEVKTID--ASIVNAVAVTEQLLSVSPDLAKNLTRA 310  
  
 FgJ03939 TFDMEKEFYGYCEKFMHSP-DINDRQRFVVTALFDALTGNIFHSATLRLRYVRHGERPLPCKC--- 371  
 CO27-CPS CREWEDEHRIILVADILAQN--DTPVLRAVLQGLEFQMSGNELWSRTTLRYVQPRP--- 334  
 EC38-CPS CREWEDEHRIILVADILAQN--DTPVLRAVLQGLEFQMSGNELWSRTTLRYVQPRP--- 334  
 C4A-CPS CREWEHRRHETLVKELQVR--ETPALRSYVKGLEYQMSGNELWSRTTLRYVQPRP--- 313  
 AtARS CREWEHRRHETLVKELQVR--ETPALRSYVKGLEYQMSGNELWSRTTLRYVQPRP--- 320  
 PrARS TREWETVHDEIVAEKIASPDGCSEAAKAYMKGLEYQMSGNELWSRTTLRYVQPRP--- 342  
 EC38-PGS LKGFEDAATS-LSEMTSSDAKLSQDTQSFIKWCRYFITGVQGWLSLESRRYGMACECLNEDGSLSVL 407  
 Hyp3 LWDLELQIHDELTRLKQTD--LTSQWRFARGMVEVCAGNIFYSATCLRYAKPGLRGI--- 372  
 FfAAS SFDVEKKYYAESERFMRDP-ALNDKQRTVIALFDCLTGNLFPHATLGRYSRYAEVFDCKT--- 371

**Figure S4.** Sequence alignment of FgFs and the clade IV of fungi class I terpene synthase. The red boxes represent the conserved “DDXXD/E”, “NSE/DTE”, “R”, and “RY” motifs.

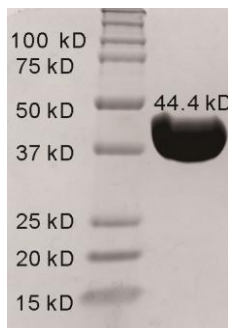

**Figure S5.** SDS-PAGE analysis of recombinant sesquiterpene cyclase FgJ03939.

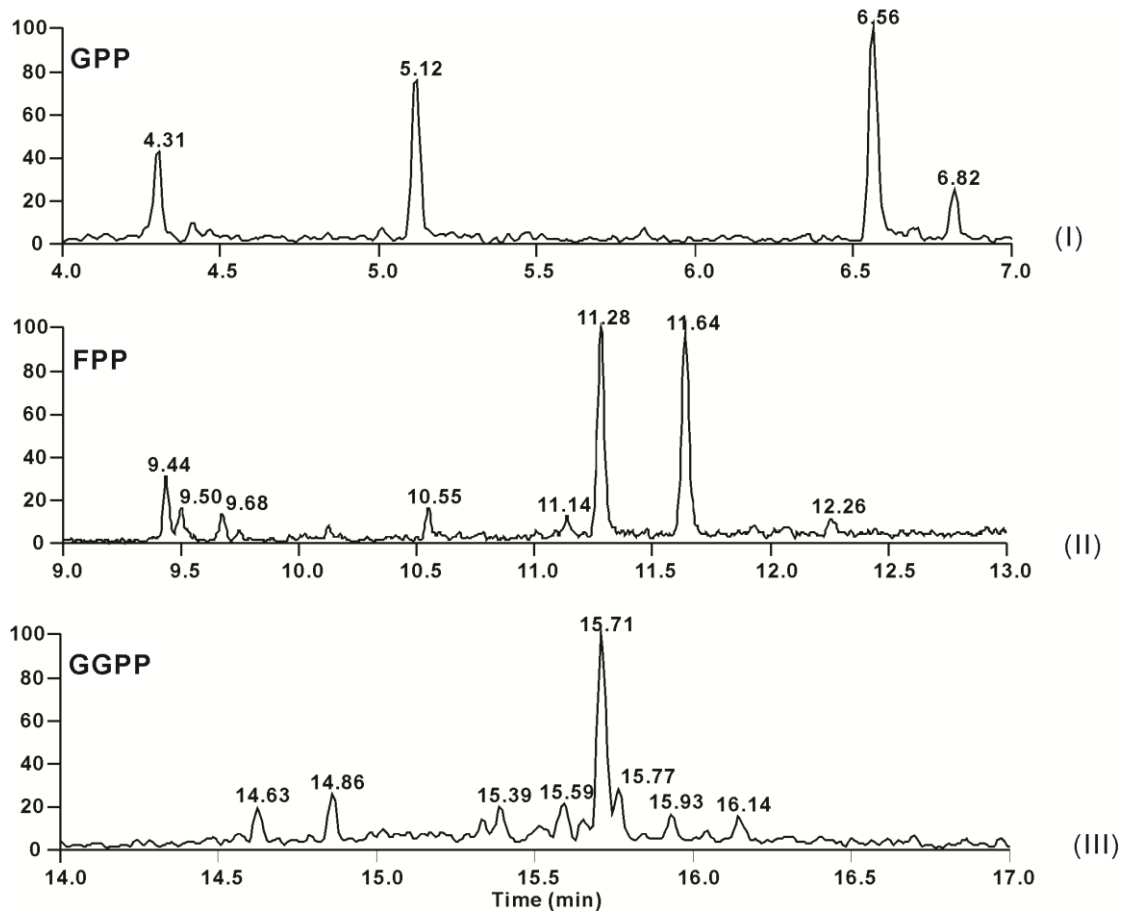

**Figure S6.** *In vitro* assay of purified FgFS by using GPP (i), FPP (ii), and GGPP (iii) as substrate, respectively.



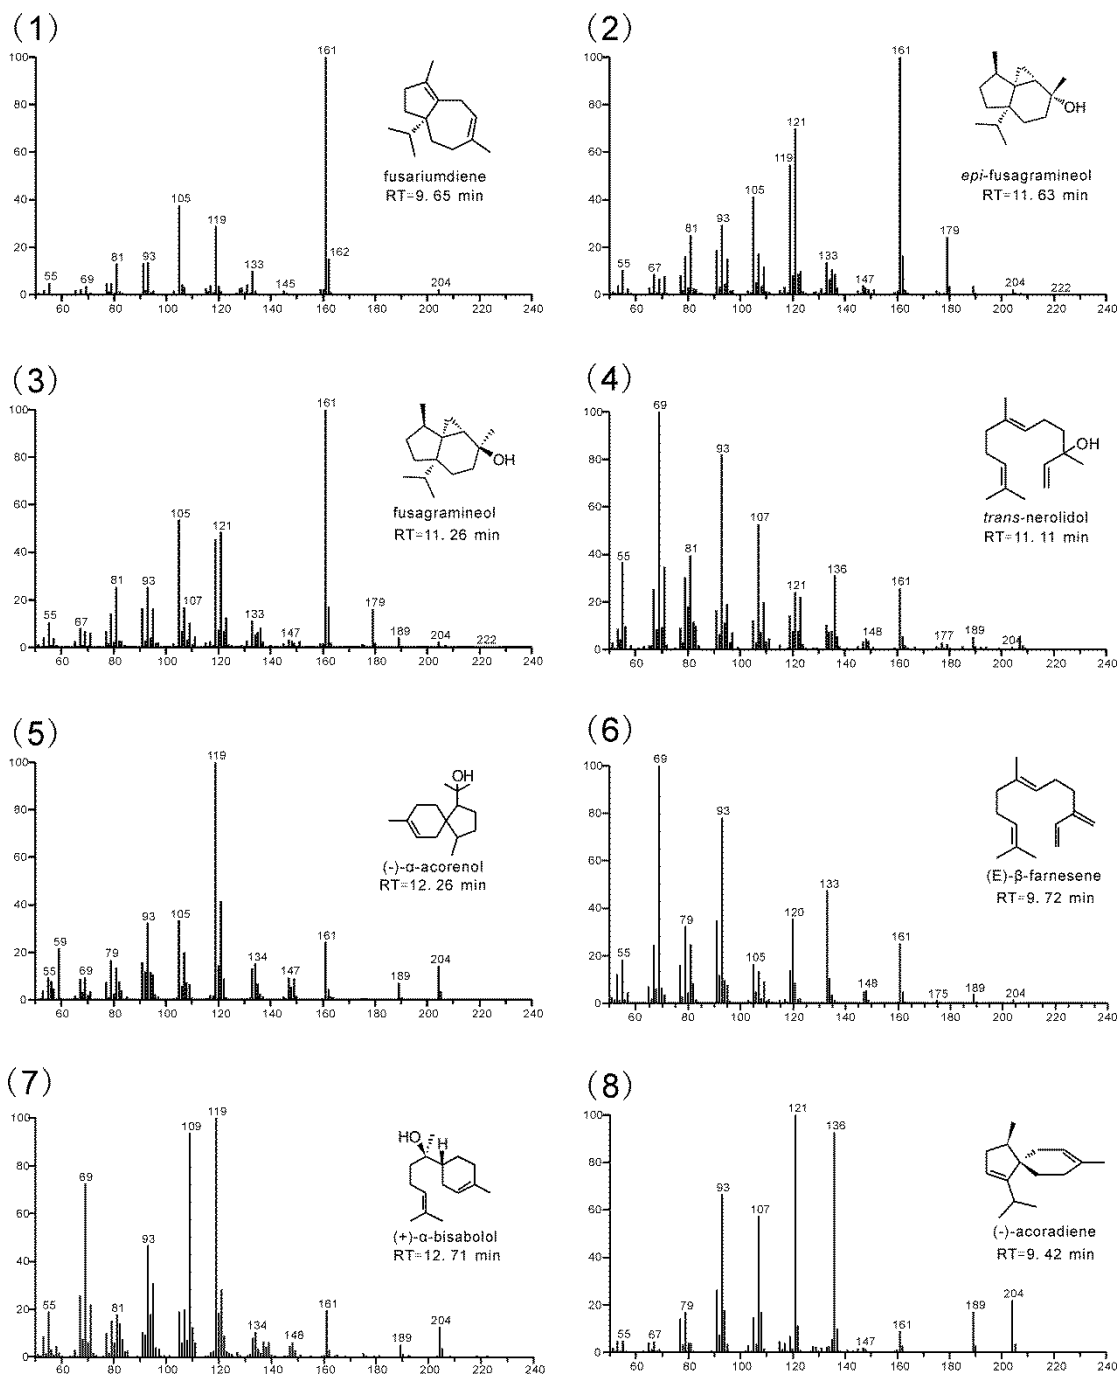

**Figure S7.** Mass spectra of sesquiterpenes produced by FgFS.

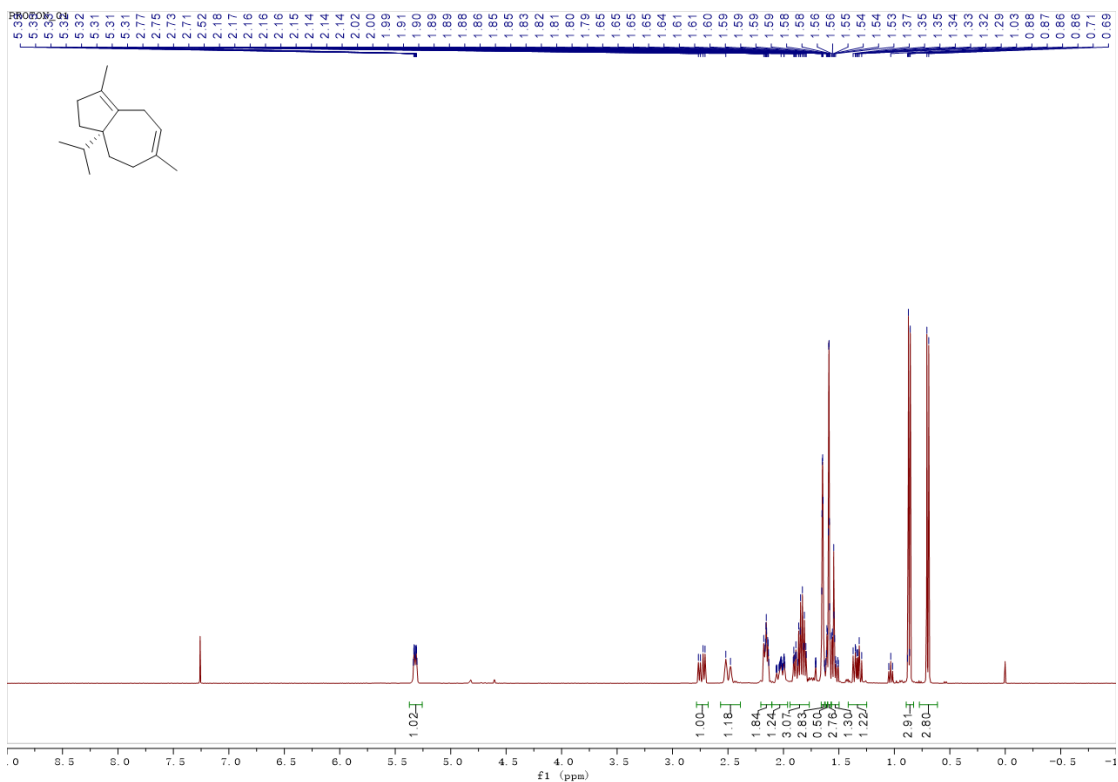

**Figure S8a.** <sup>1</sup>H NMR spectrum of compound **1** (CDCl<sub>3</sub>, 400 MHz).

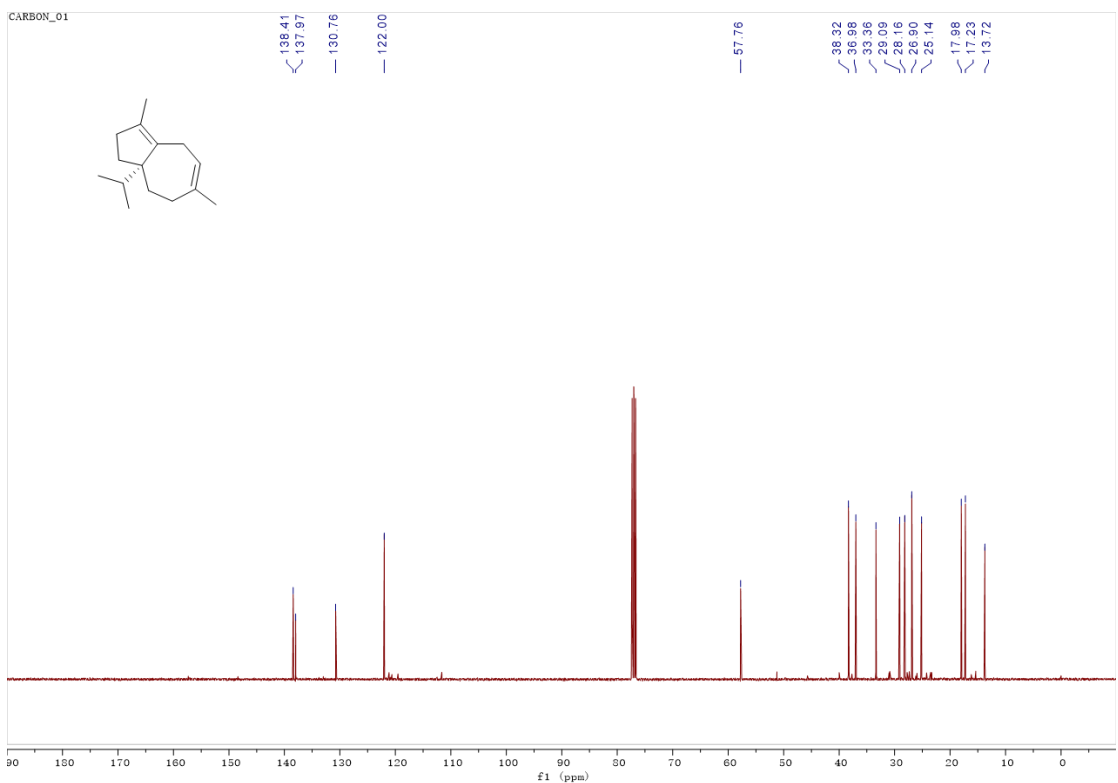

**Figure S8b.** <sup>13</sup>C NMR spectrum of compound **1** (CDCl<sub>3</sub>, 101 MHz).

282

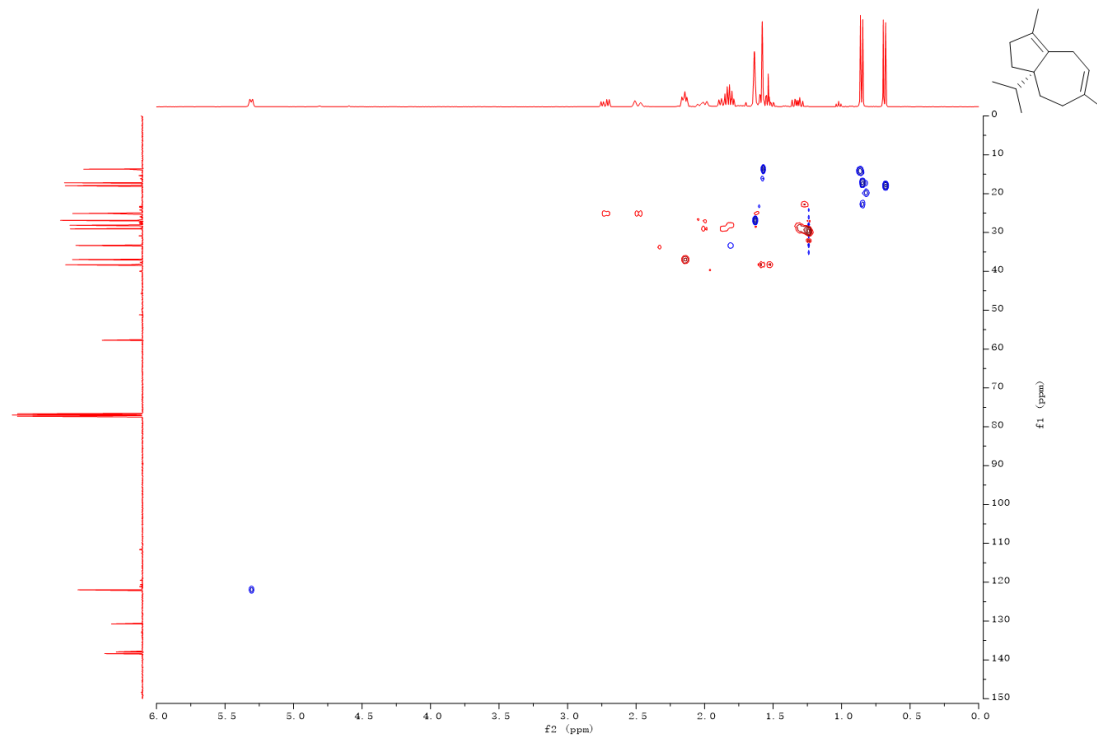

283

284 **Figure S8c.** HSQC spectrum of compound **1** in CDCl<sub>3</sub>.

285

286

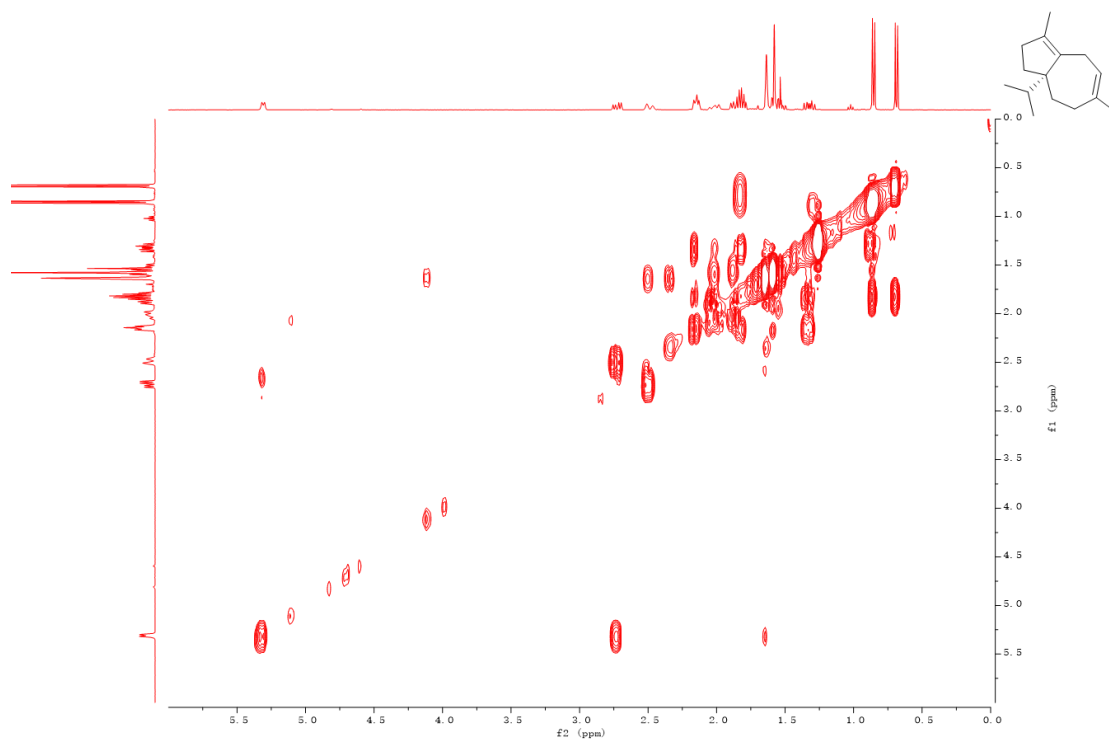

287

288 **Figure S8d.** <sup>1</sup>H-<sup>1</sup>H COSY spectrum of compound **1** in CDCl<sub>3</sub>.

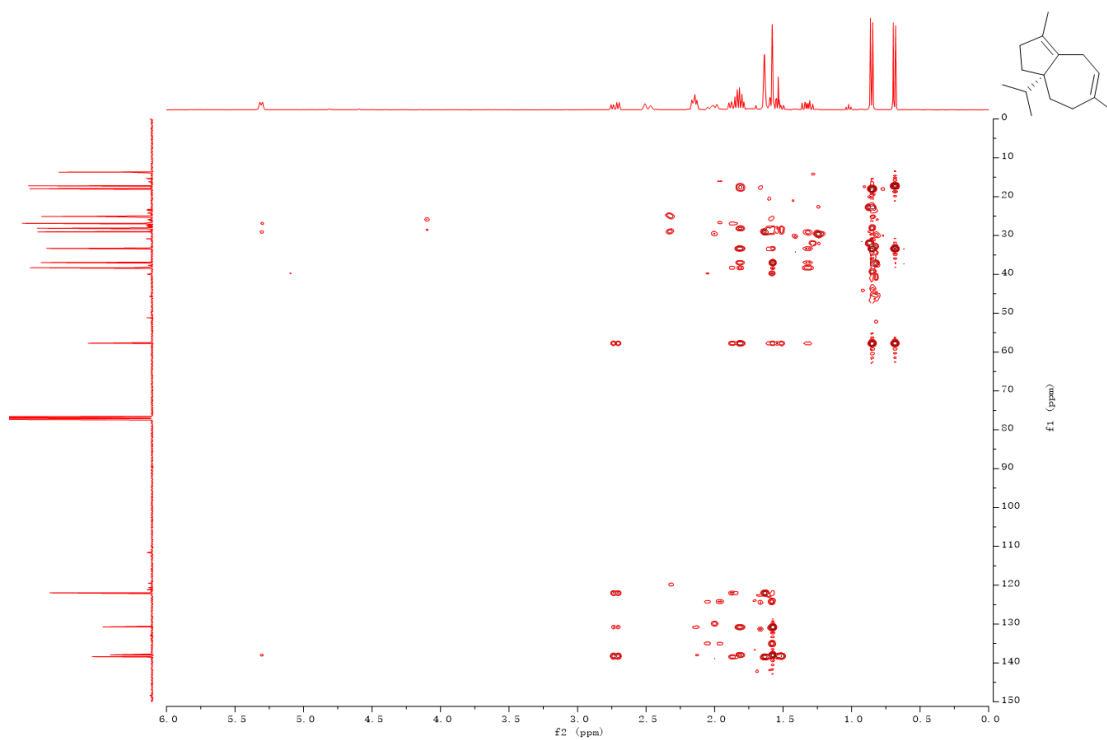

**Figure S8e.** HMBC spectrum of compound **1** in CDCl<sub>3</sub>.

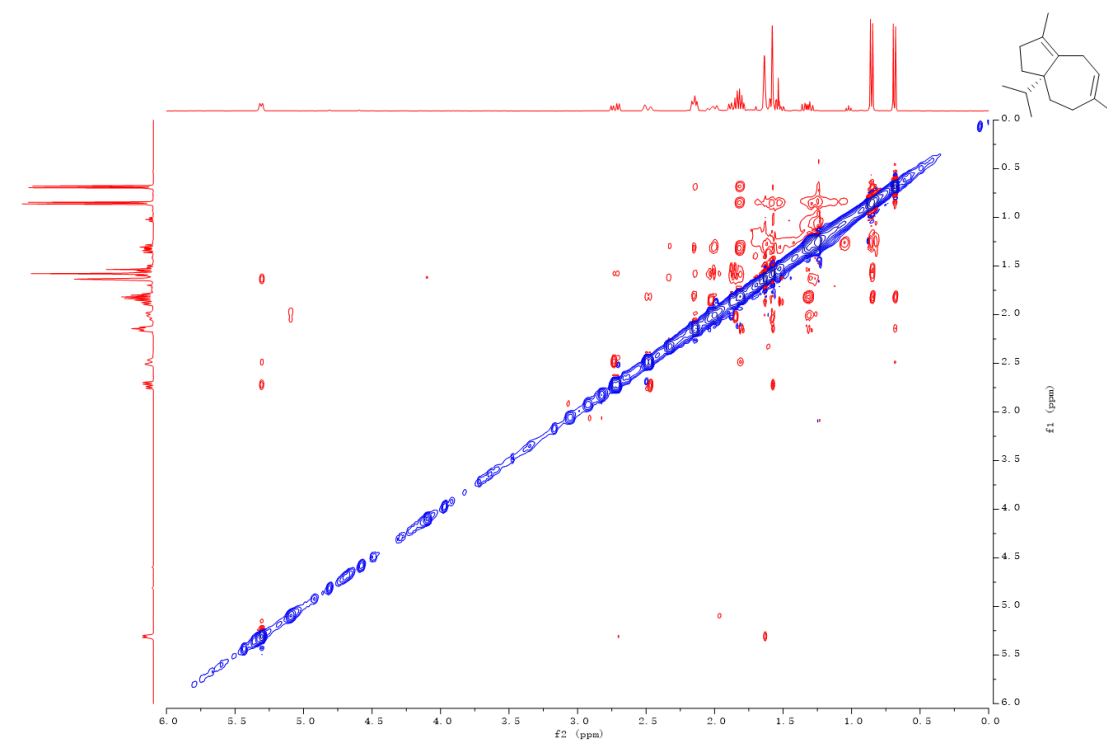

**Figure S8f.** NOESY spectrum of compound **1** in CDCl<sub>3</sub>.

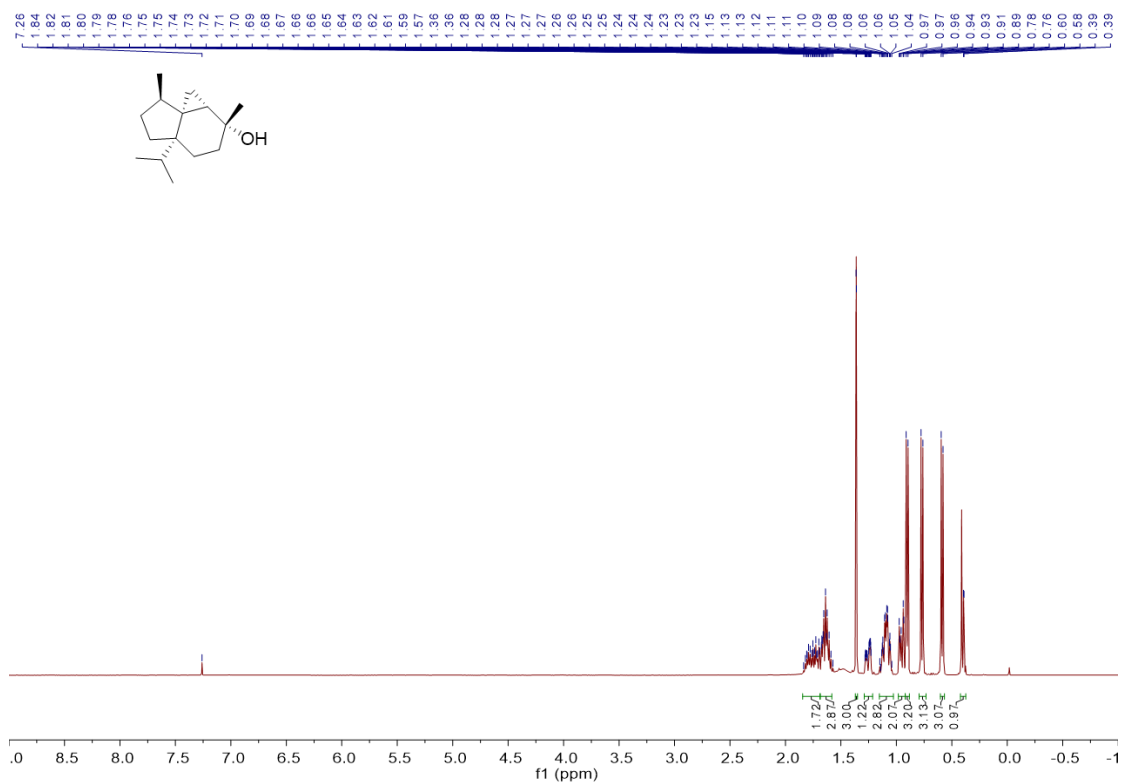

**Figure S9a.** <sup>1</sup>H NMR spectrum of compound 2 (CDCl<sub>3</sub>, 400 MHz).

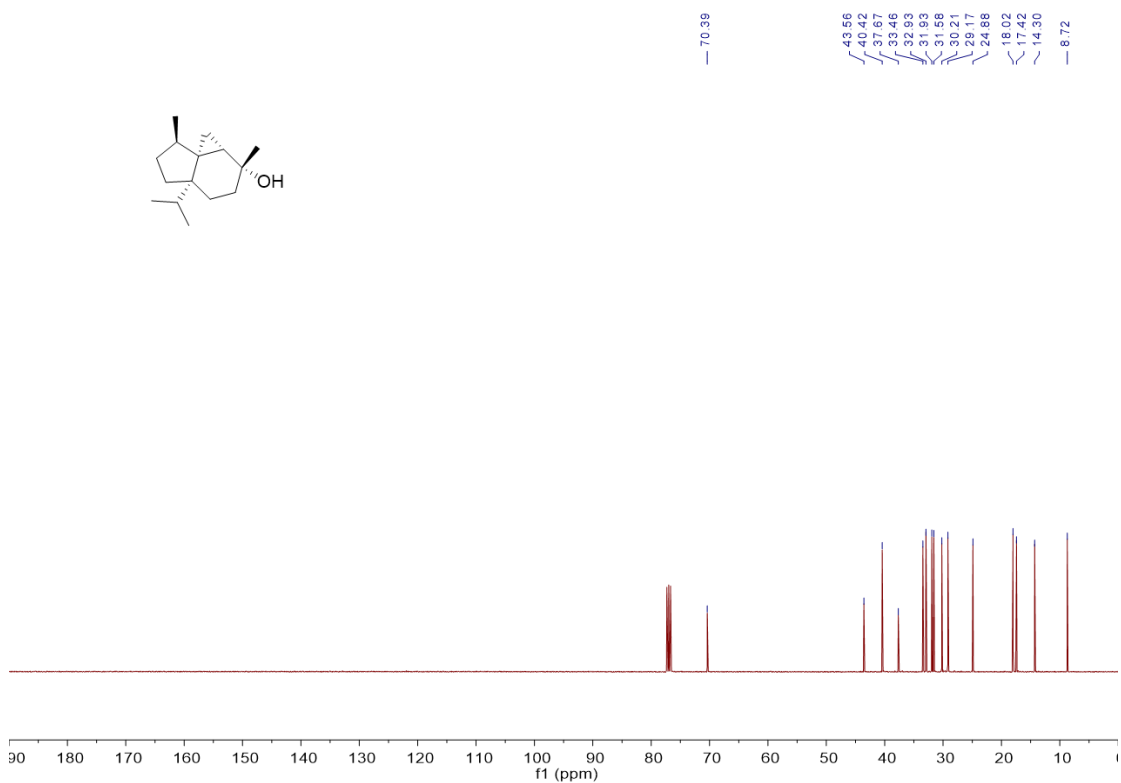

**Figure S9b.** <sup>13</sup>C NMR spectrum of compound 2 (CDCl<sub>3</sub>, 101 MHz).

300

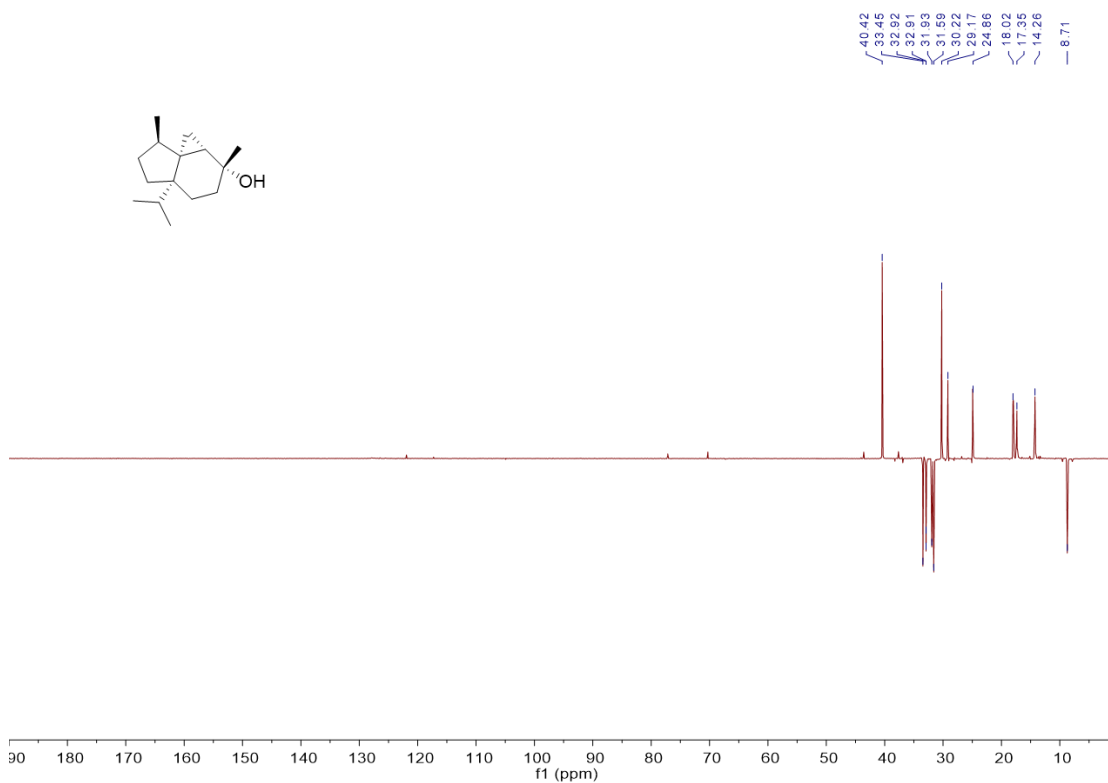

301

302 **Figure S8c.** DEPT135 spectrum of compound **2** (CDCl<sub>3</sub>, 101 MHz).

303

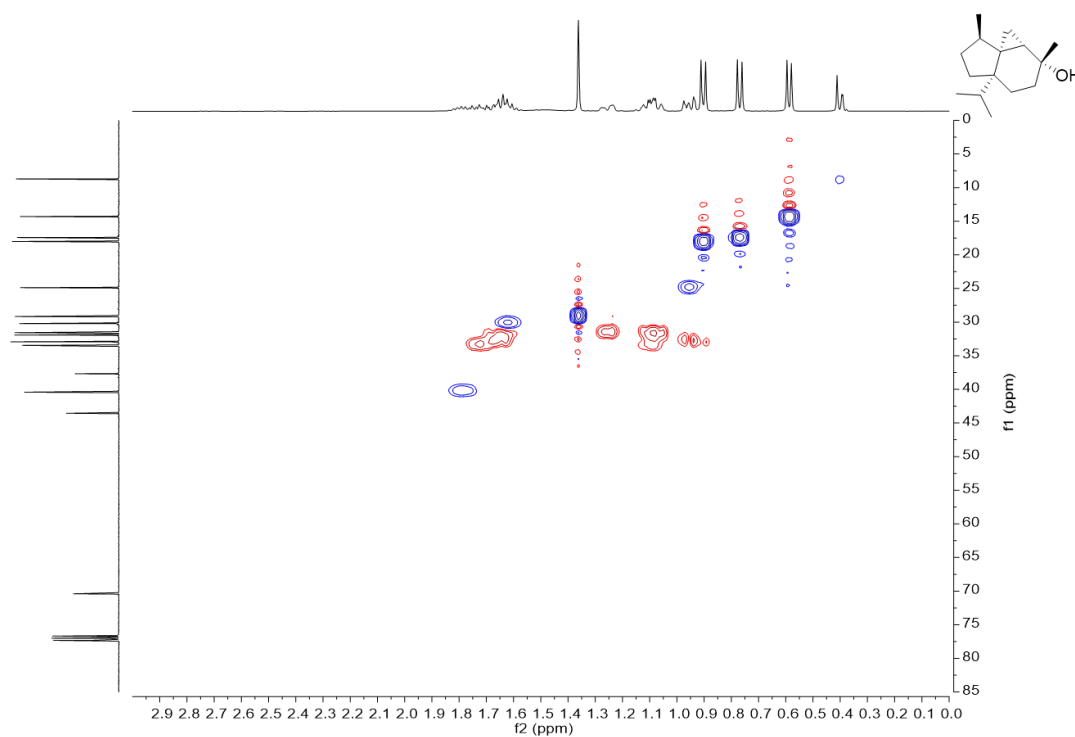

304

305 **Figure S9d.** HSQC spectrum of compound **2** in CDCl<sub>3</sub>.

306

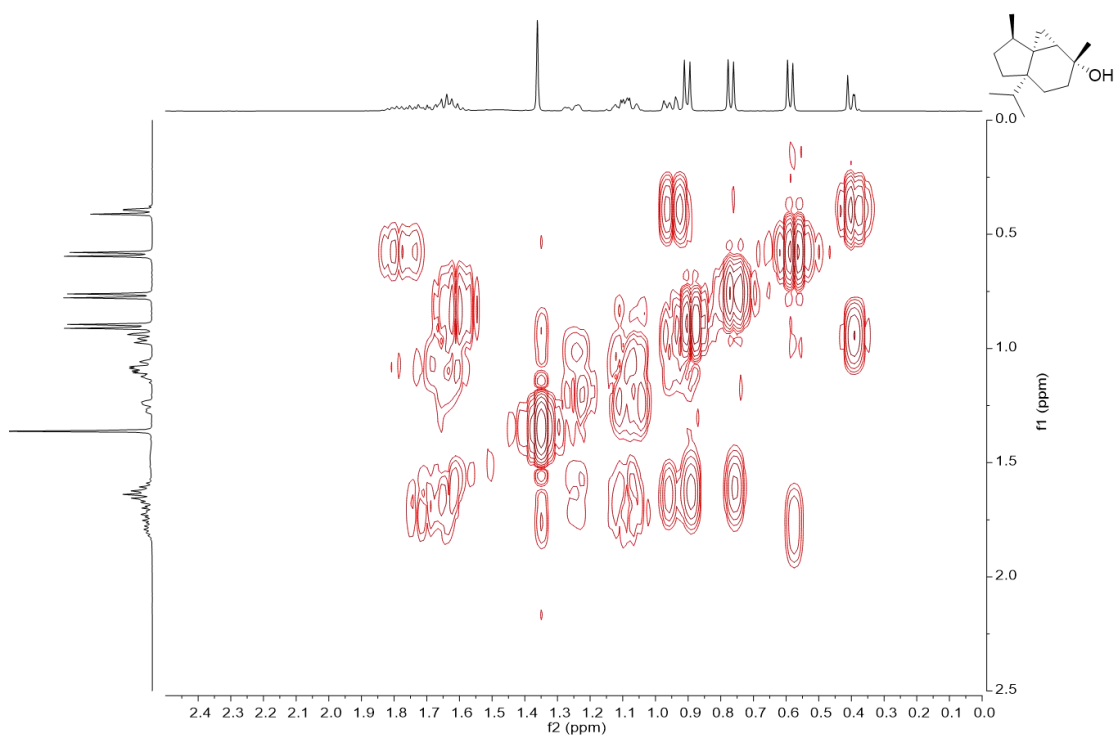

307

308 **Figure S9e.**  $^1\text{H}$ - $^1\text{H}$  COSY spectrum of compound **2** in  $\text{CDCl}_3$ .

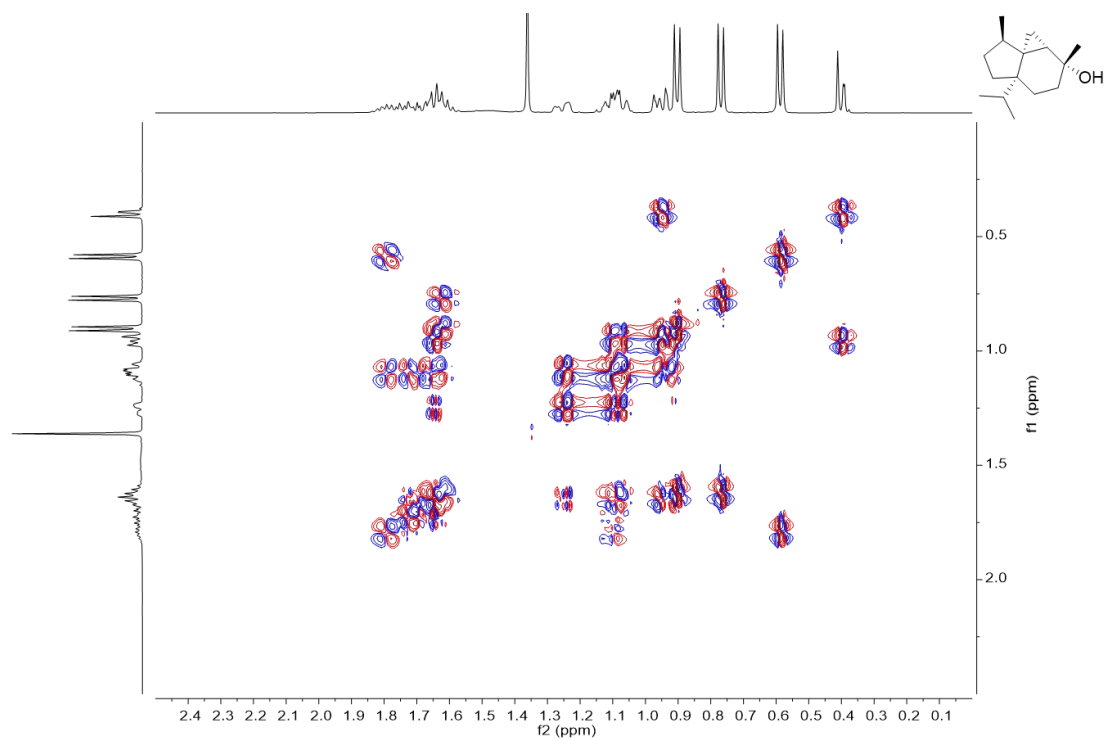

309

310 **Figure S9f.** DQF-COSY spectrum of compound **2** in  $\text{CDCl}_3$ .

311

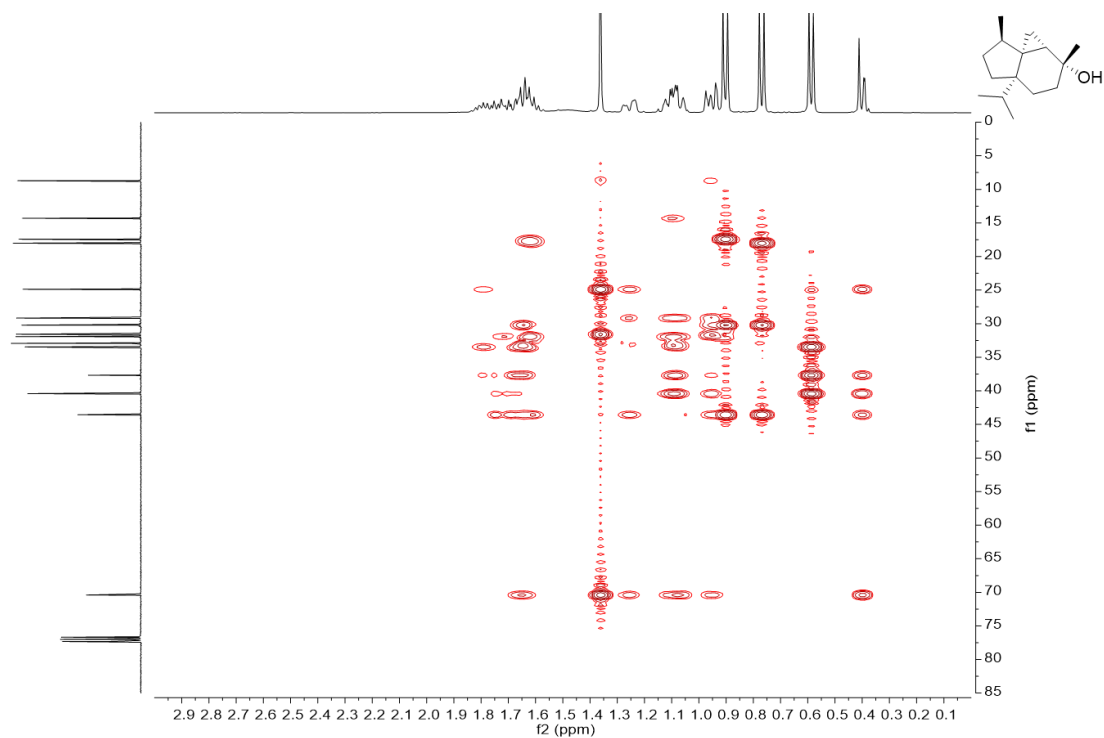

**Figure S9g.** HMBC spectrum of compound **2** in CDCl<sub>3</sub>.

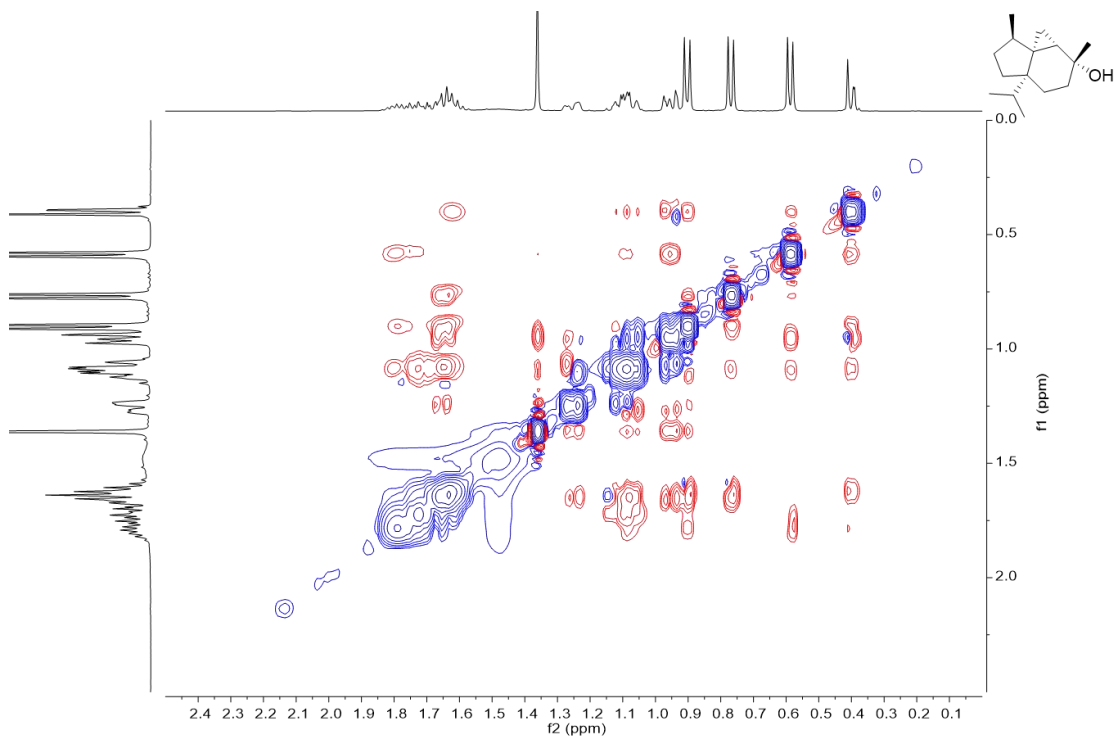

**Figure S9h.** NOESY spectrum of compound **2** in CDCl<sub>3</sub>.



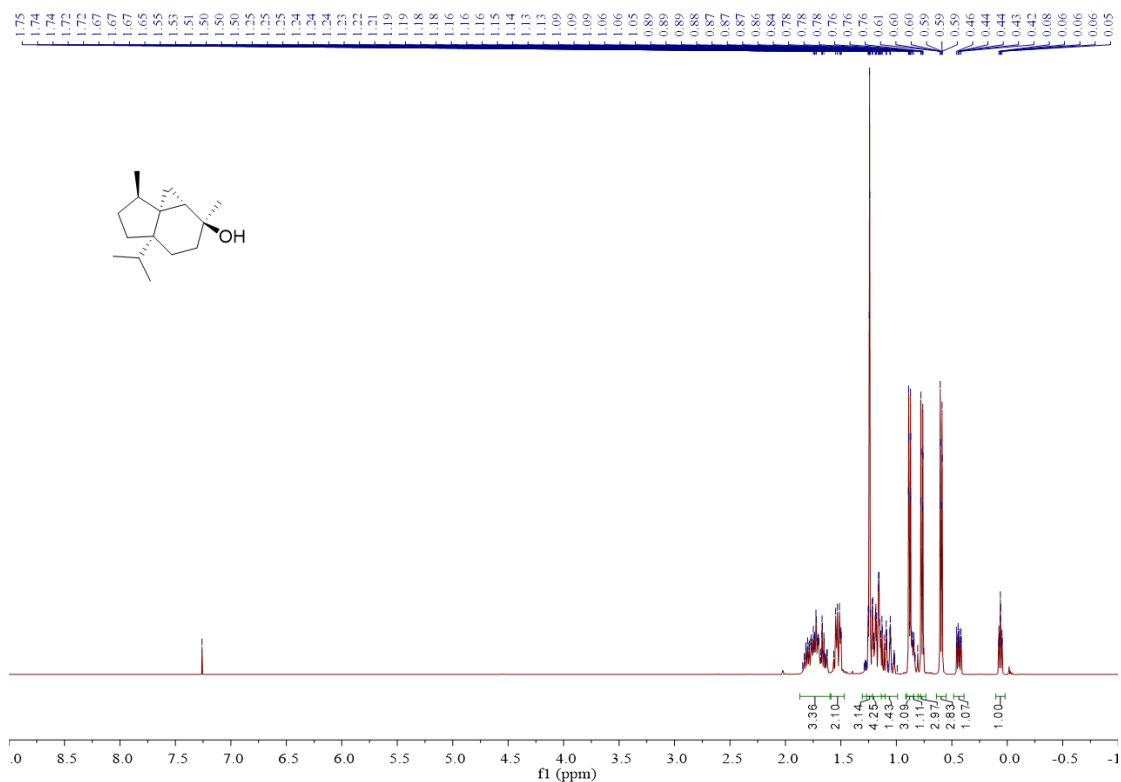

**Figure S10a.** <sup>1</sup>H NMR spectrum of compound **3** (CDCl<sub>3</sub>, 400 MHz).

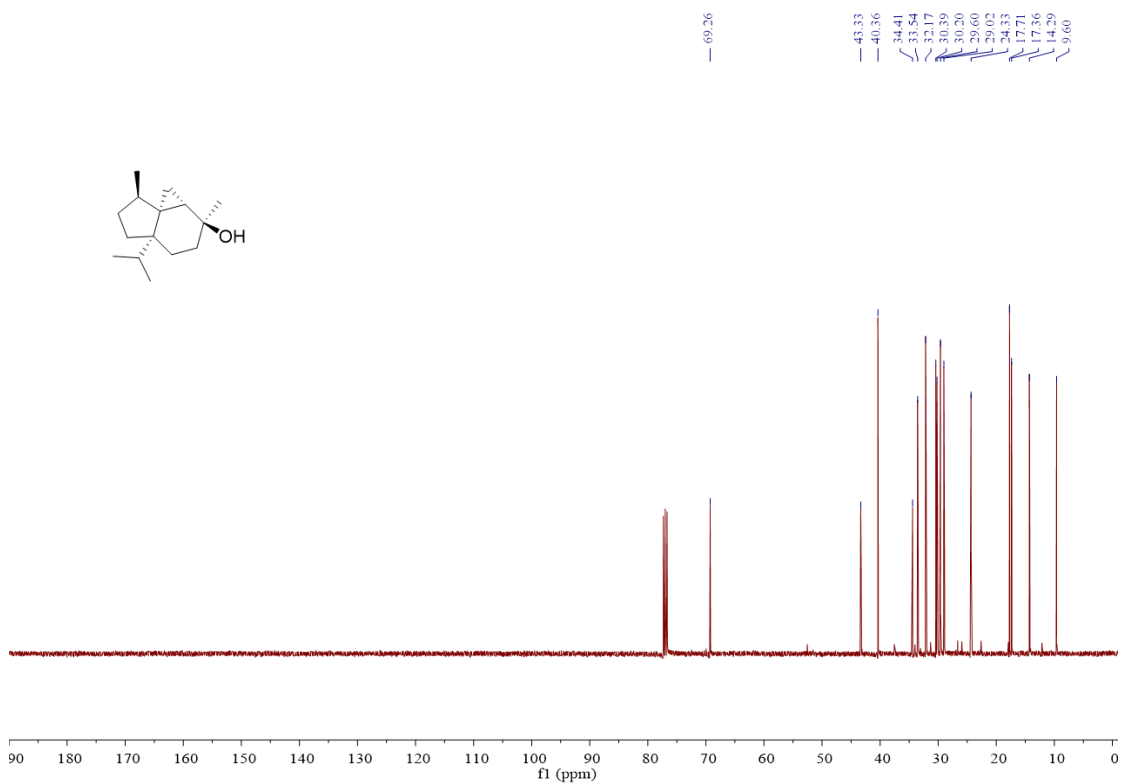

**Figure S10b.** <sup>13</sup>C NMR spectrum of compound **3** (CDCl<sub>3</sub>, 101 MHz).

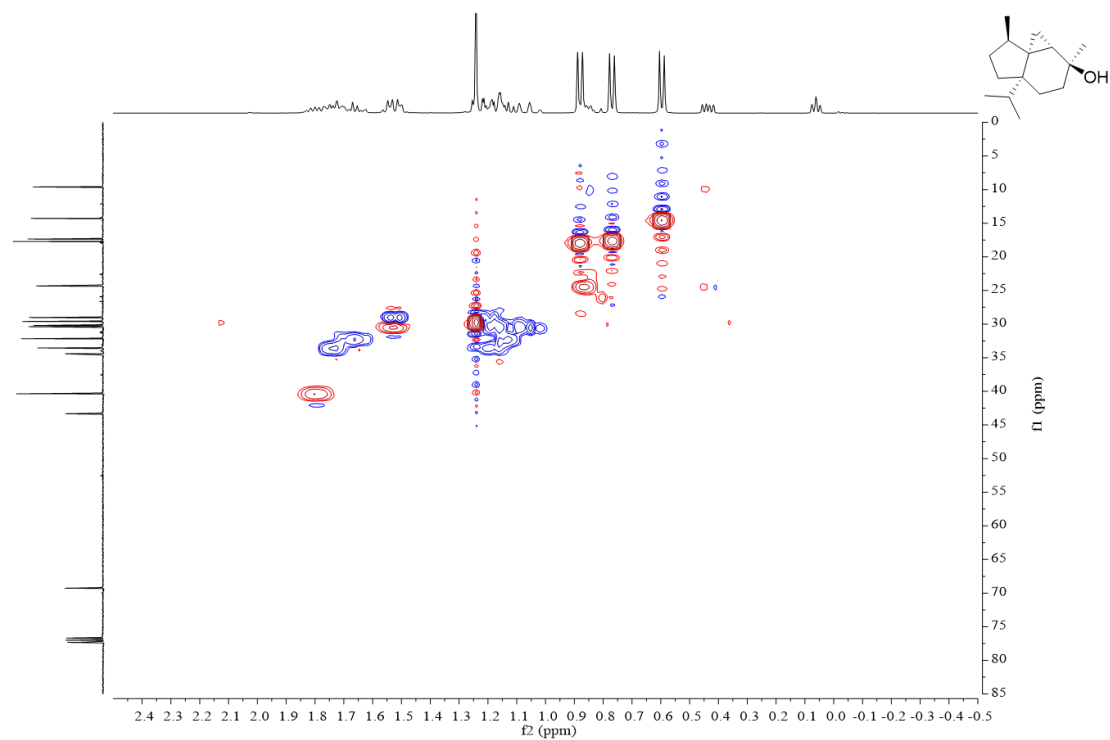

**Figure S10c.** HSQC spectrum of compound **3** in CDCl<sub>3</sub>.

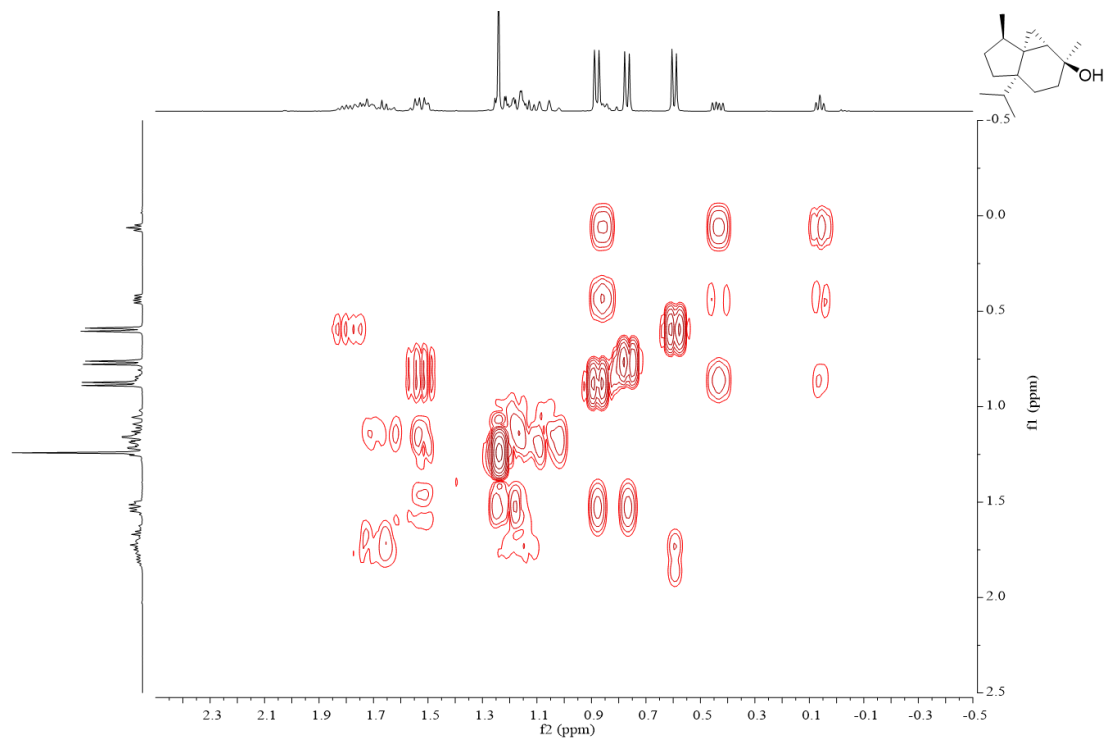

**Figure S10d.** <sup>1</sup>H-<sup>1</sup>H COSY spectrum of compound **3** in CDCl<sub>3</sub>.

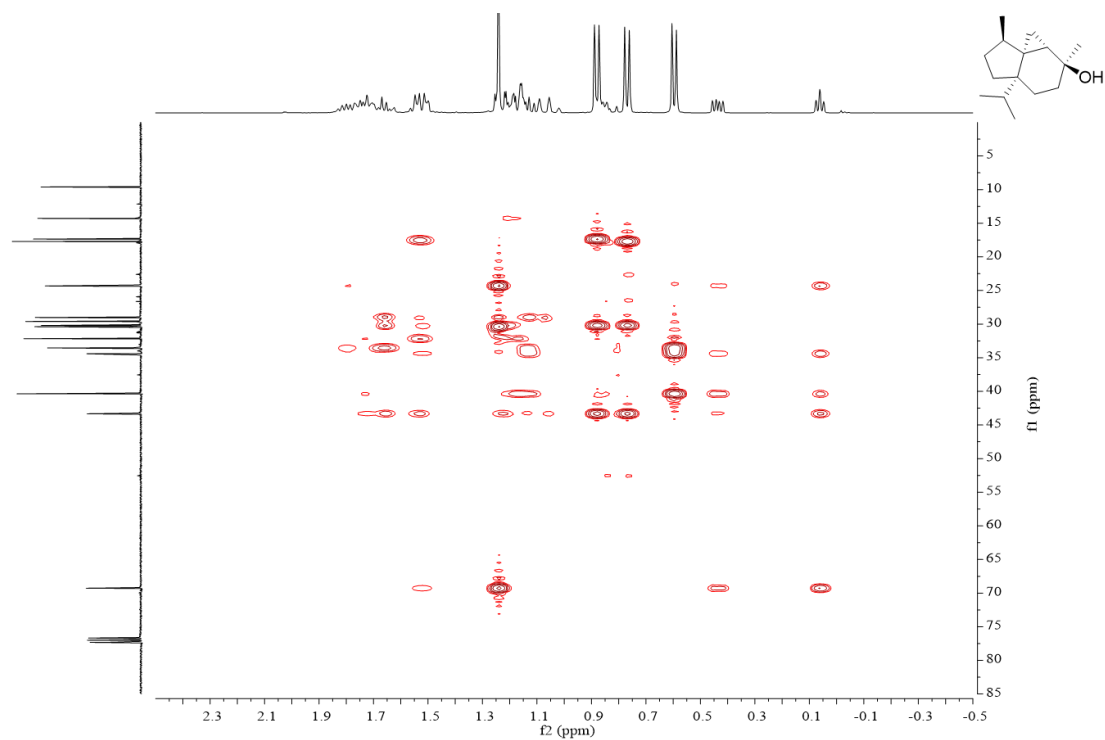

**Figure S10e.** HMBC spectrum of compound **3** in CDCl<sub>3</sub>.

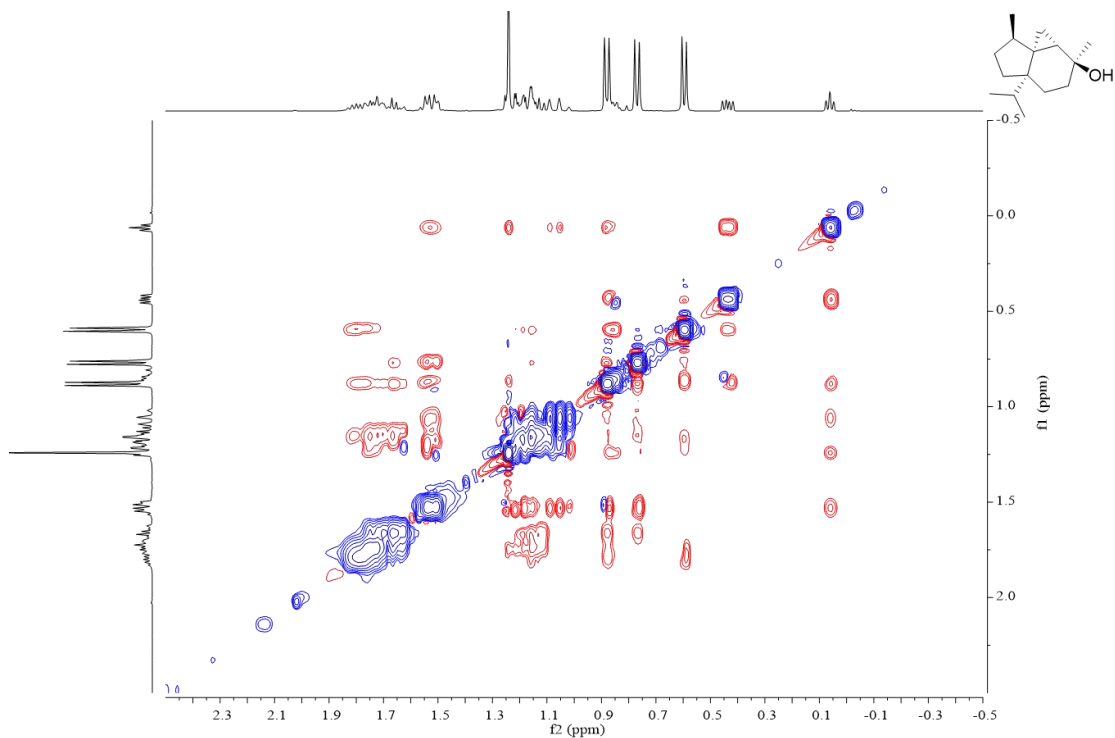

**Figure S10f.** NOESY spectrum of compound **3** in CDCl<sub>3</sub>.

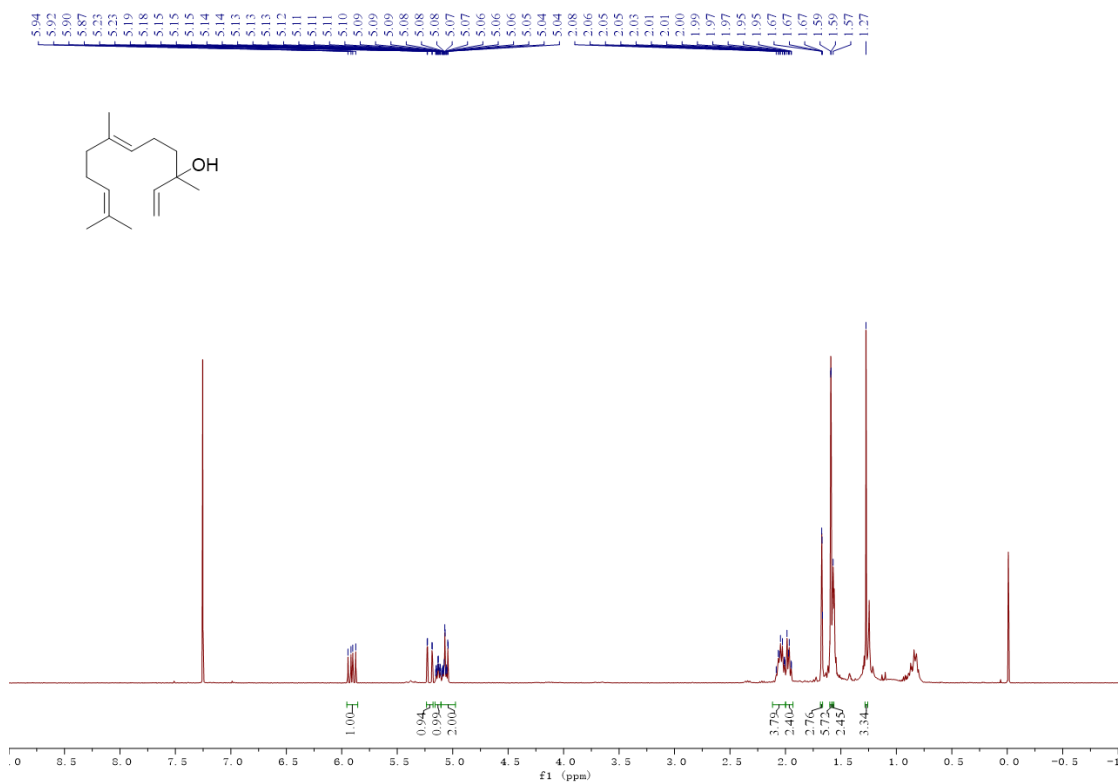

**Figure S11a.** <sup>1</sup>H NMR spectrum of compound **4** in CDCl<sub>3</sub>.

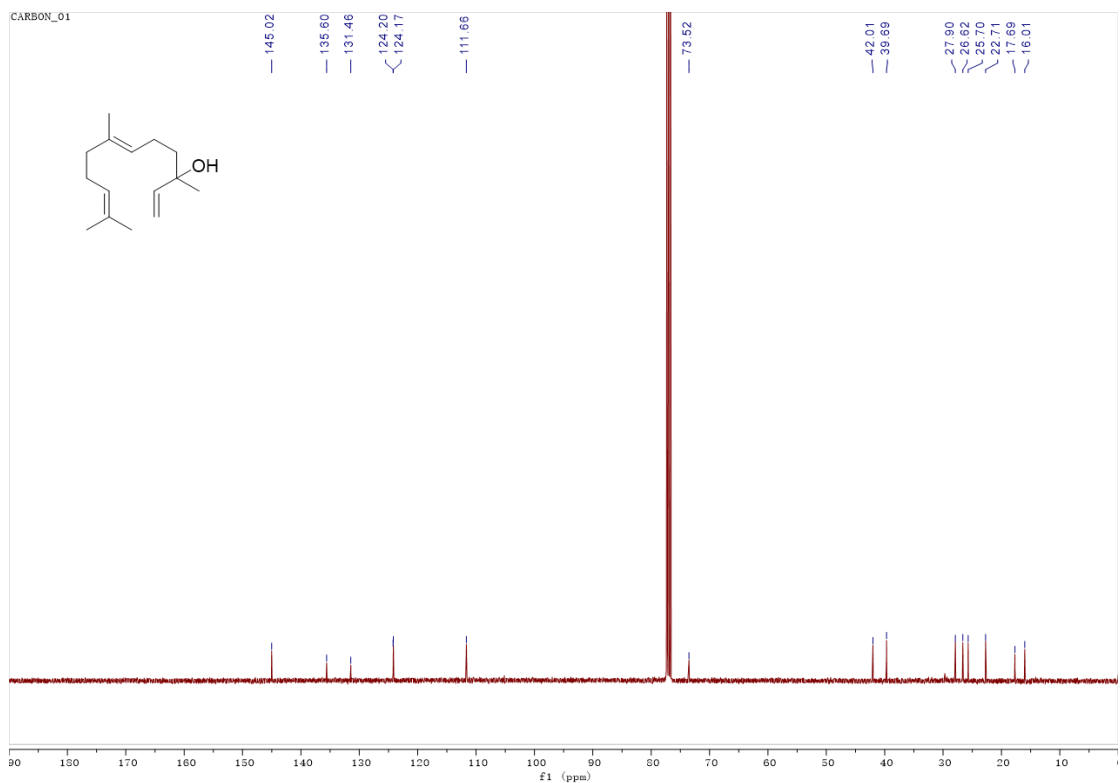

**Figure S11b.** <sup>13</sup>C NMR spectrum of compound **4** in CDCl<sub>3</sub>.

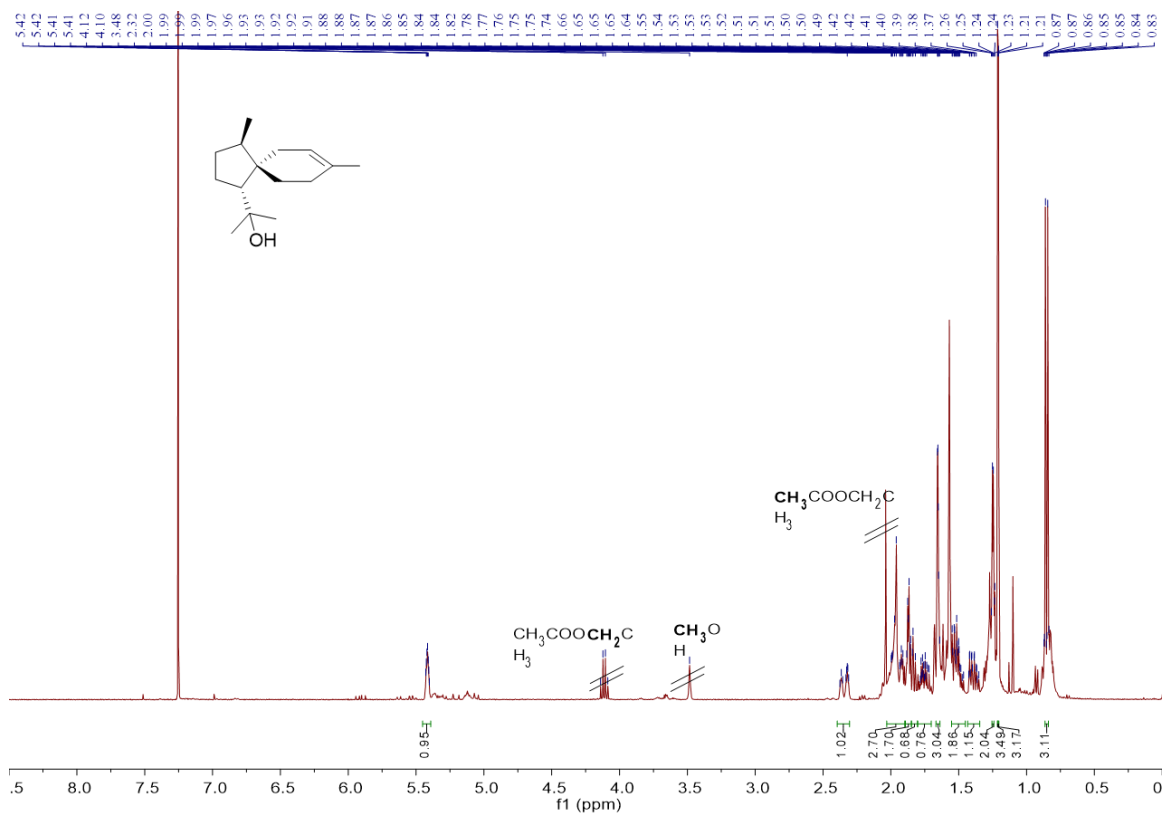

**Figure S12a.** <sup>1</sup>H NMR spectrum of compound **5** in CDCl<sub>3</sub>.

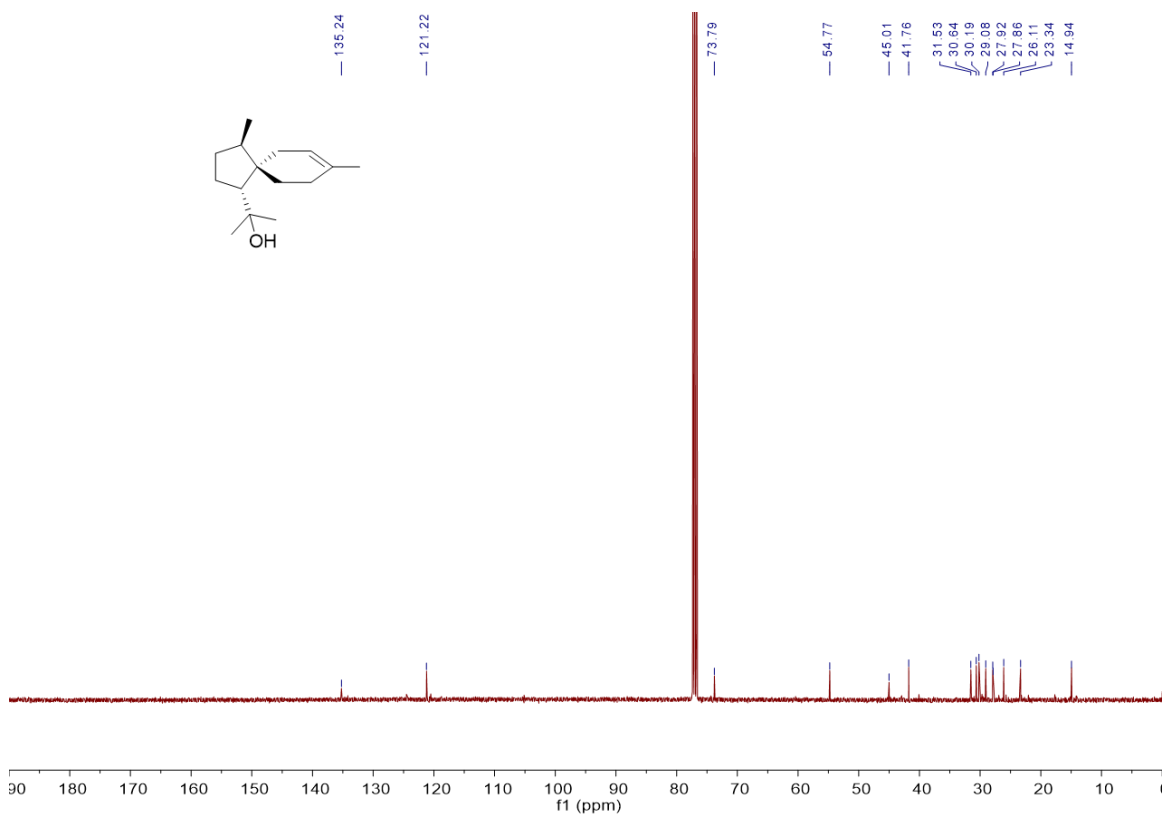

**Figure S12b.** <sup>13</sup>C NMR spectrum of compound **5** in CDCl<sub>3</sub>.

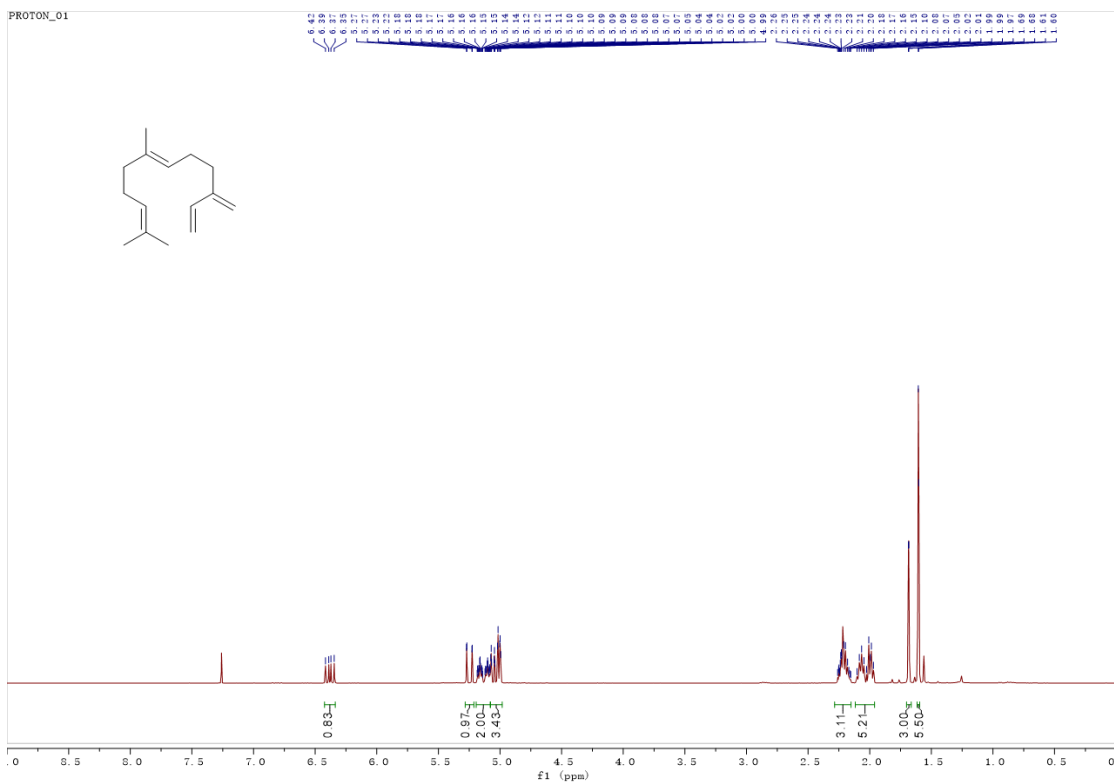

**Figure S13a.**  $^1\text{H}$  NMR spectrum of compound **6** in  $\text{CDCl}_3$ .

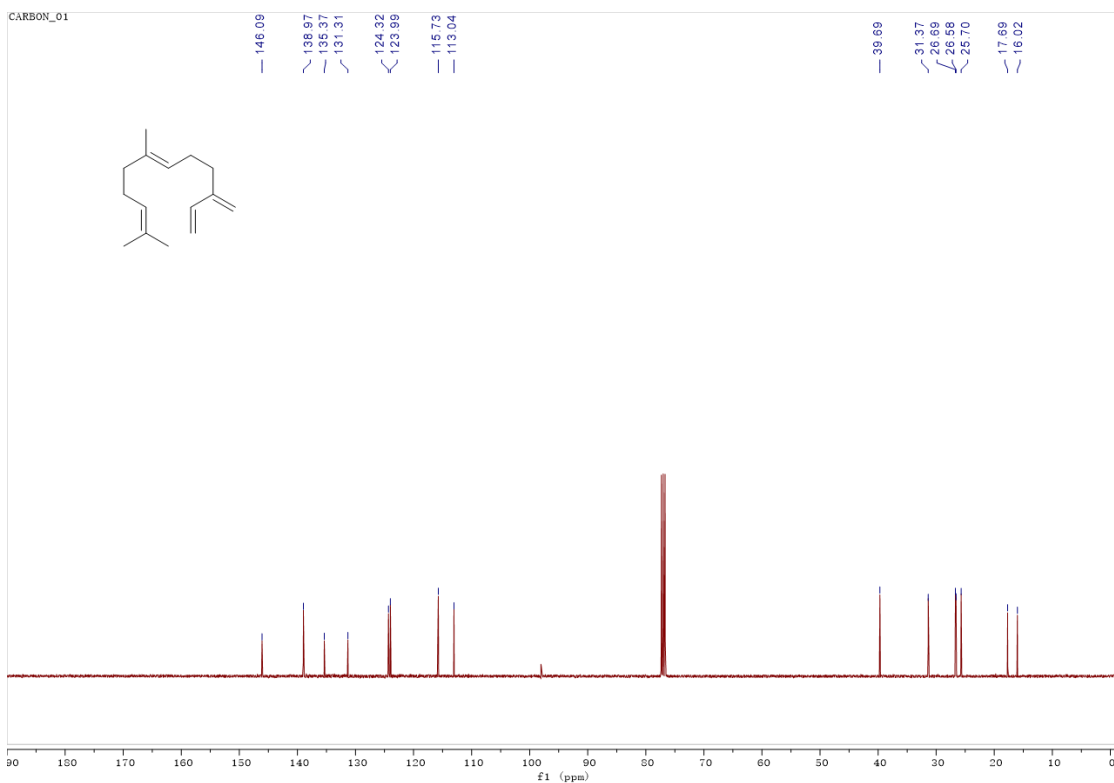

**Figure S13b.**  $^{13}\text{C}$  NMR spectrum of compound **6** in  $\text{CDCl}_3$ .

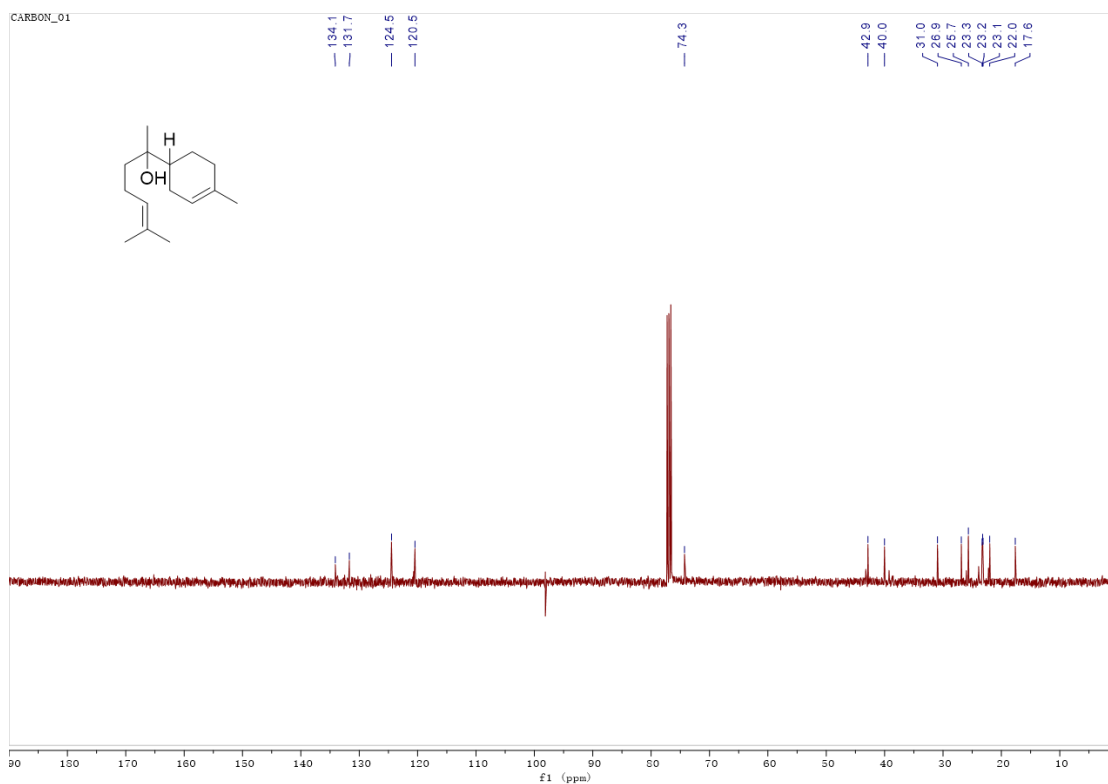

**Figure S14.**  $^{13}\text{C}$  NMR spectrum of compound **7** in  $\text{CDCl}_3$

346  
347

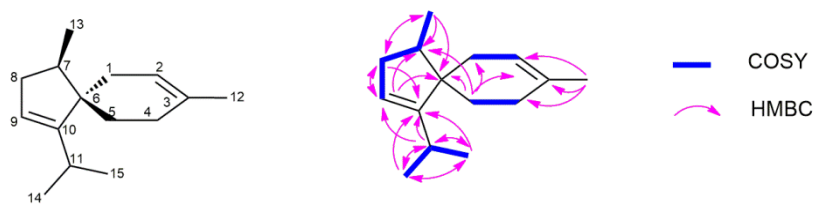

348

349 **Figure S15a.** The planar structure,  $^1\text{H}$ - $^1\text{H}$  COSY and the key HMBC correlations of  
350 compound 8.

351

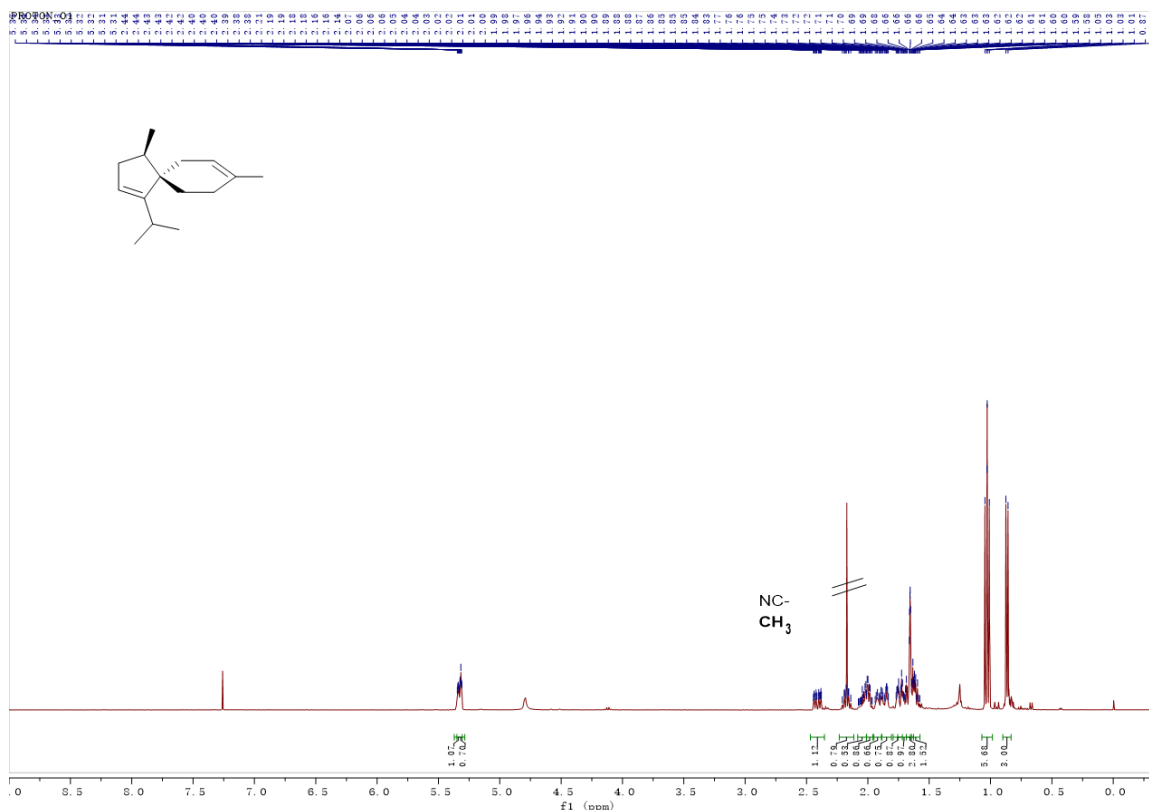

352

353 **Figure S15b.**  $^1\text{H}$  NMR spectrum of compound 8 ( $\text{CDCl}_3$ , 400 MHz).



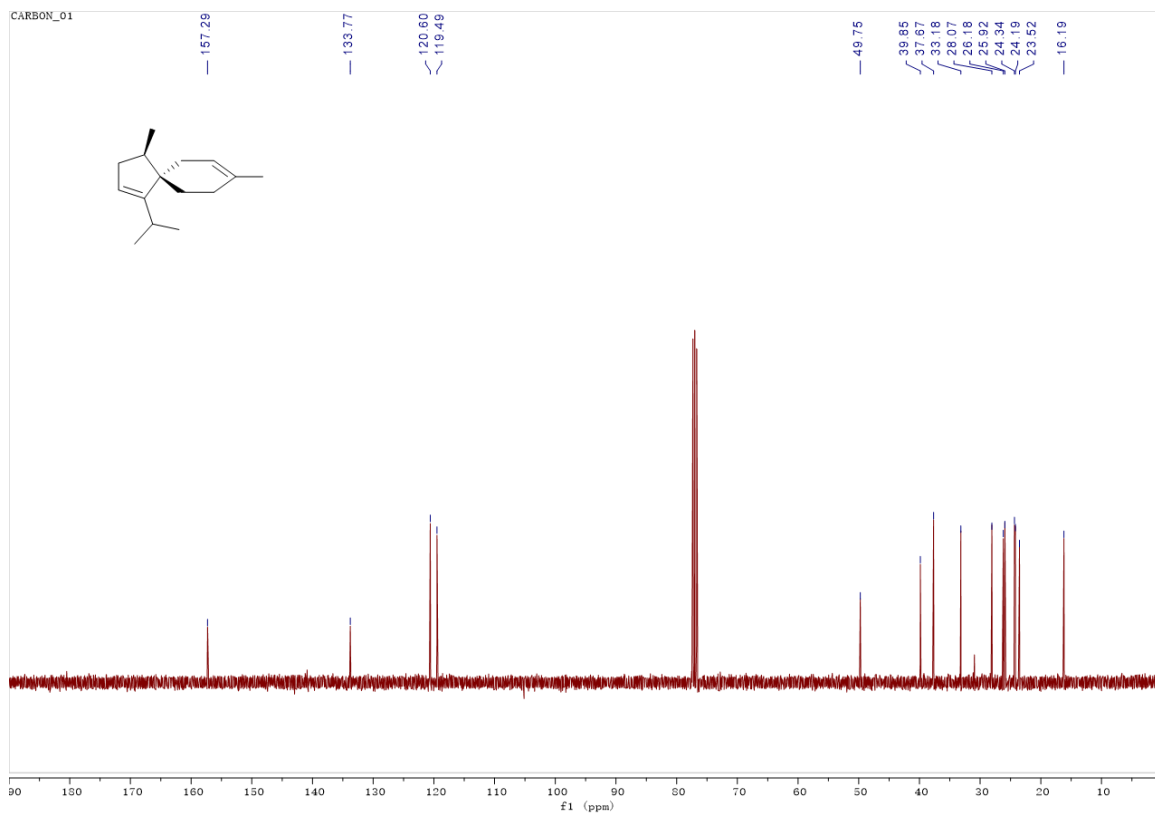

**Figure S15c.**  $^{13}\text{C}$  NMR spectrum of compound **8** ( $\text{CDCl}_3$ , 101 MHz).

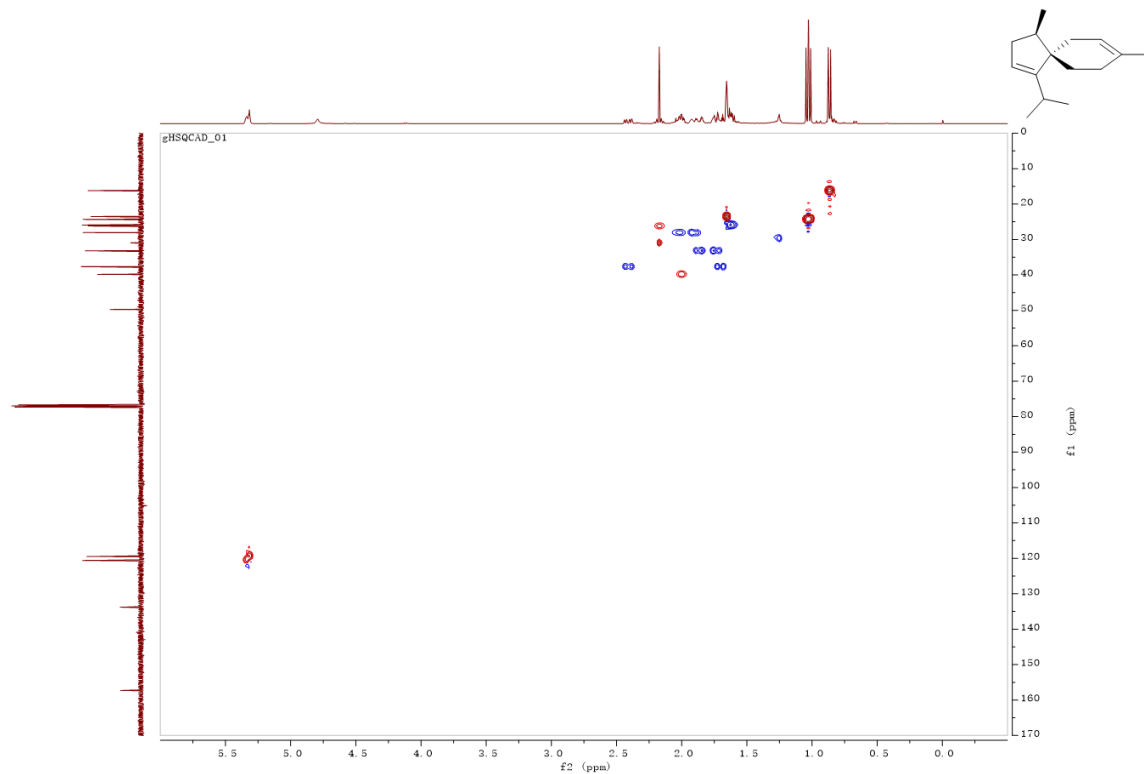

**Figure S15d.** HSQC spectrum of compound **8** in  $\text{CDCl}_3$ .

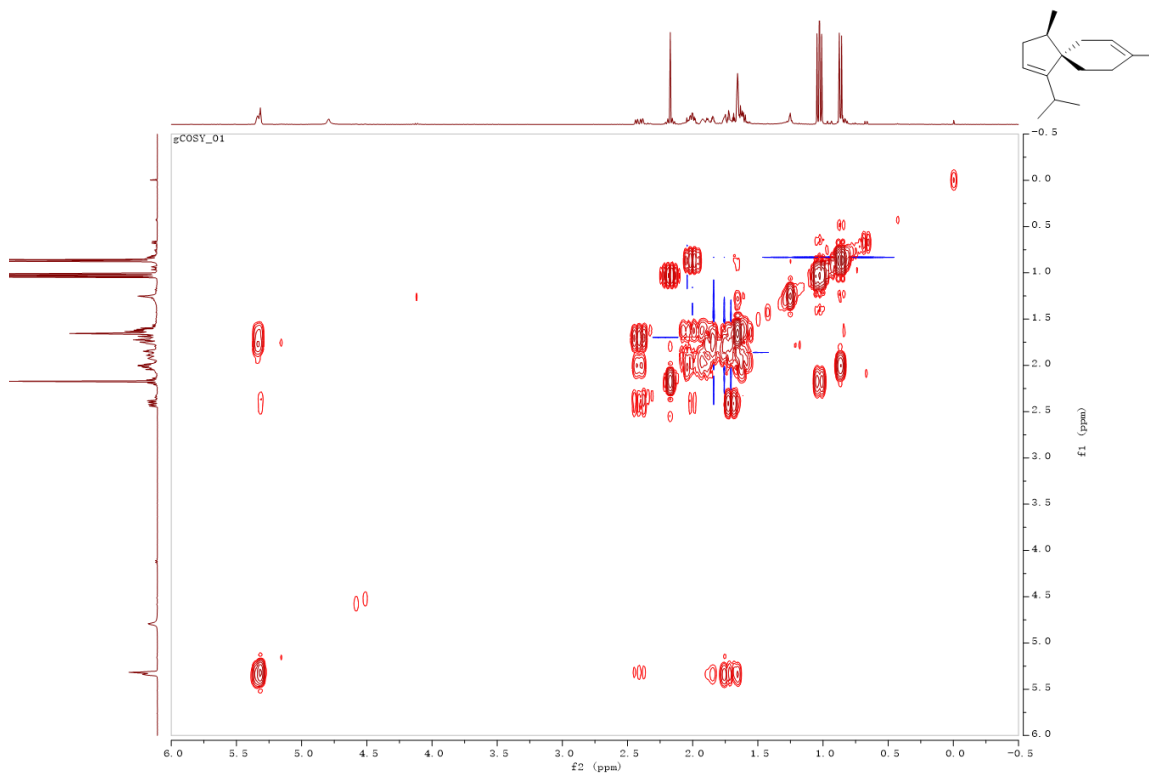

**Figure S15e.**  $^1\text{H}$ - $^1\text{H}$  COSY spectrum of compound **8** in  $\text{CDCl}_3$ .

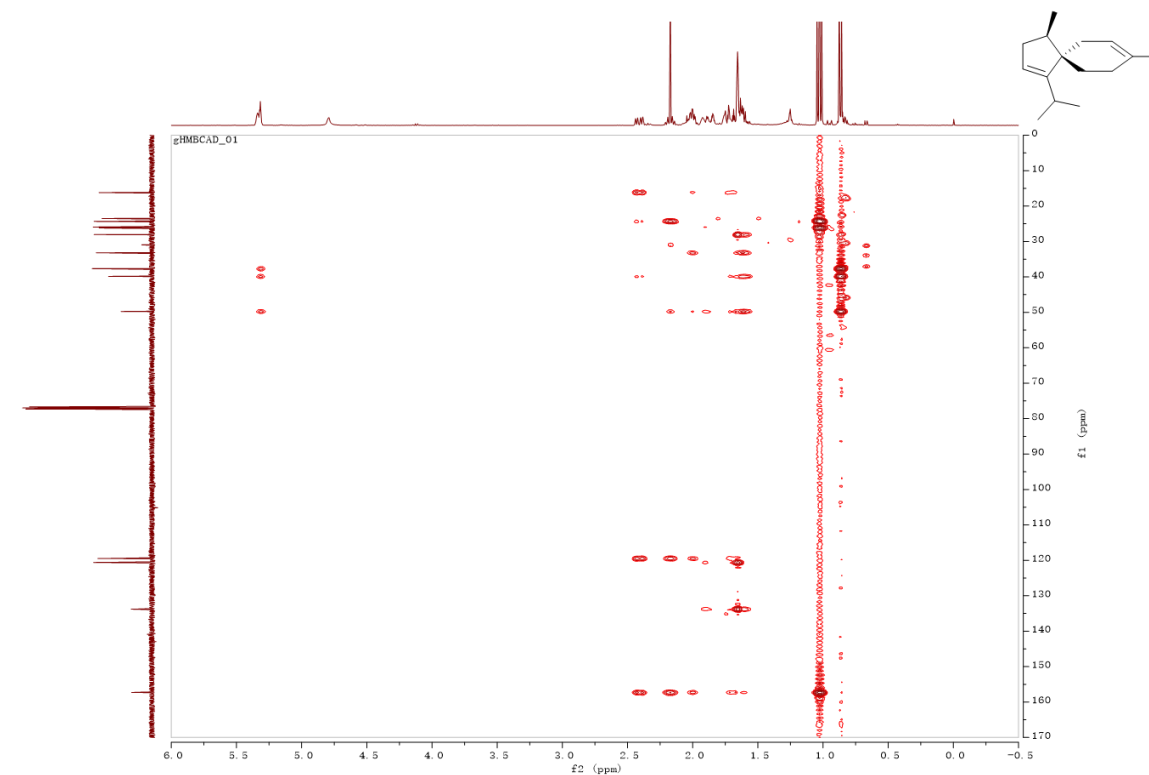

**Figure S15f.** HMBC spectrum of compound **8** in  $\text{CDCl}_3$ .

363

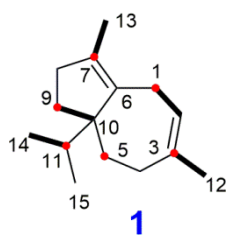

364

365 **Figure S16.** Compound **1** obtained from [1- $^{13}\text{C}$ ,  $^2\text{H}_3$ ] sodium acetate feeding experiment.

366

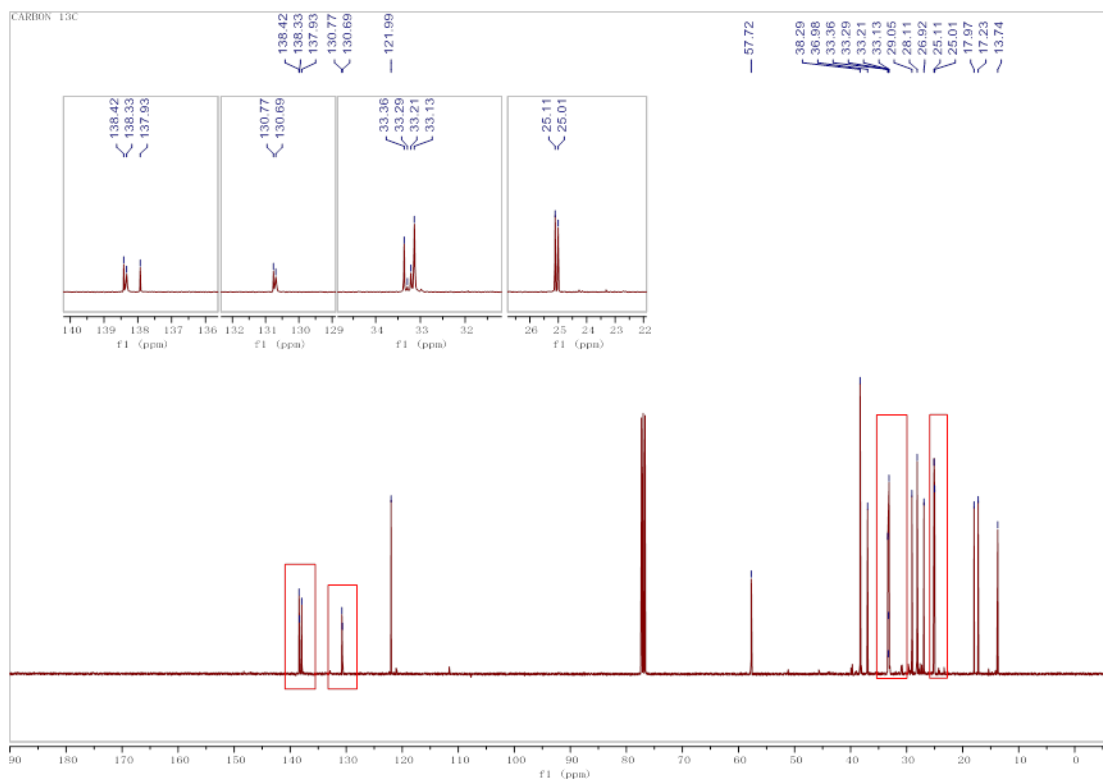

367

368 **Figure S17.**  $^{13}\text{C}$  NMR spectra of  $^{13}\text{C}$ -labeled compound **1** ( $\text{CDCl}_3$ , 101 MHz).

369

370

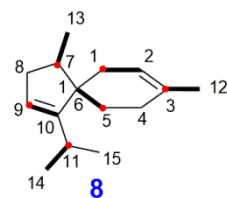

371

372 **Figure S18.** Compound **8** obtained from [1- $^{13}\text{C}$ ,  $^2\text{H}_3$ ] sodium acetate feeding experiment.

373

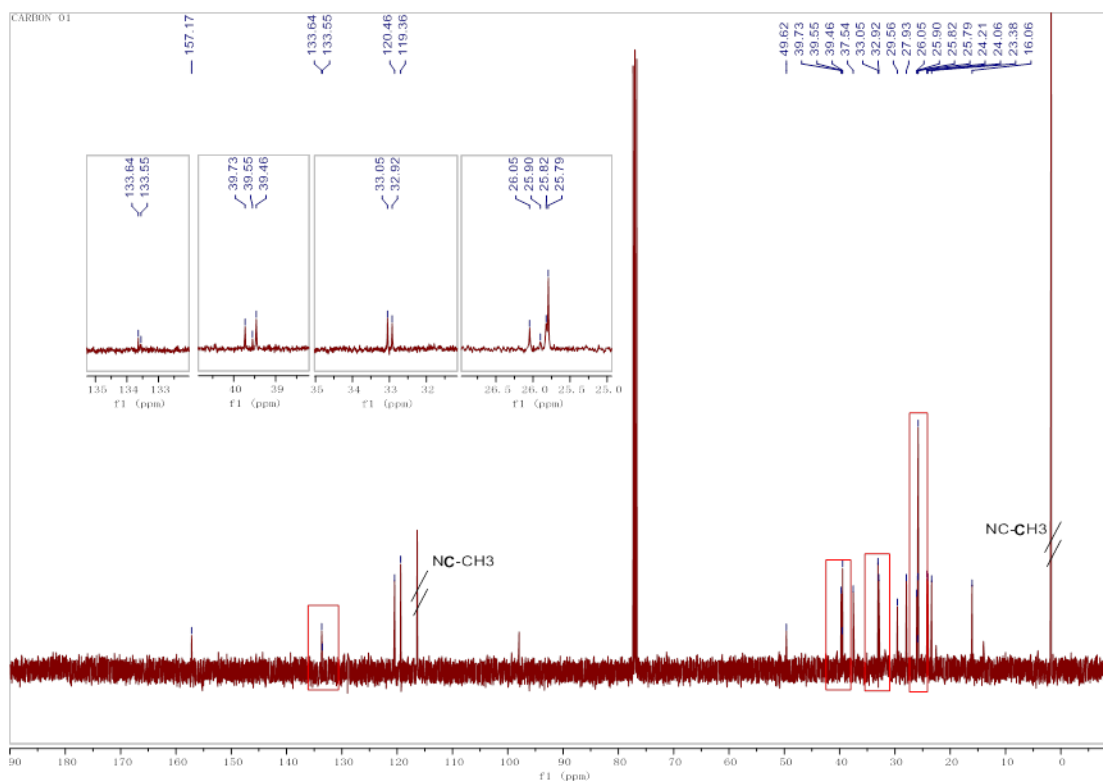

374

375 **Figure S19.**  $^{13}\text{C}$  NMR spectra of  $^{13}\text{C}$ -labeled compound **8** ( $\text{CDCl}_3$ , 101 MHz).

376

377

Table S1. Oligonucleotides for the construction of plasmids used in this research.

| No. | Primer name        | Sequence 5'-3'                                              |
|-----|--------------------|-------------------------------------------------------------|
| P1  | 1411 F             | GCAATTAACCTCACTAAAGGGAACAAAAGCGGCGCGCttcaccgattctgagcgaat   |
| P2  | 1411 R             | GGCATCCGCTTACAGACAAGCTGTGAAAAGAAAGTGAATATTCATTCATATCATATTT  |
| P3  | 1417 F             | AAAGAAGTGTCAAATCAAGTGTCAAATGTATACTTCTTTTTTTTACTTTGTTCAGAACA |
| P4  | 1417 R             | AGCTCCCGGAGACGGTCACAGCTTGTCTGTGCGGCCGctaatgatacgggagttgccg  |
| P5  | 1416 F             | acctctatactttaacgtcaaggagaaaaactataGCGCAATGATTGAATAGTCAAAG  |
| P6  | 1416 R             | GTGTGTTCTGAACAAAAGTAAAAAAGAAAGTATACATTTGACACTTGATTGACACTTCT |
| P7  | 1412 F             | GAAAAAATATGATATGAATGAATATTCACCTTTCTTTTCACAGCTTGTCTGTAAGCGG  |
| P8  | 1412 R             | GTGTTGATAAAAAATGTTTATCCATTGGACCGTGTAGTACCCAATTCGCCCTATAGTGA |
| P9  | 1413 F             | GCGCGTAATACGACTCACTATAGGGCGAATTGGGTACTACACGGTCCAATGGATAAACA |
| P10 | 1413 R             | ATCGTTTGAAAGATGGGTCCGTACCTGCATTAAATCCTAATCTCTGCTTTTGTGCGCG  |
| P11 | 1414 F             | GTACATACATAAACATACGCGCACAAAAGCAGAGATTAGGATTTAATGCAGGTGACGGA |
| P12 | 1414 R             | aaaaaagtaagaatttttgaattcaatataaATGGTTTTAACCAATAAACAGTCAT    |
| P13 | 1415 F             | AAATGACTGTTTTATTGGTTAAACCATttatattgaattttcaaaaattctactttt   |
| P14 | 1415 R             | AAAAAATCTTTGACTATTCAATCATTGCGCtatagtttttctccttgacgttaaagt   |
| P15 | 1418 F             | gcttatattgcggcaactcccgtatcattaaGCGGCCGCACAGACAAGCTGTGACCGTC |
| P16 | 1418 R             | acctgtgattcgctcagaatcggtgaaGCGGCCGCGCTTTTGTCCCTTTAGTGAGGGT  |
| P17 | FgJ03939 F (NdeI)  | ATATCATATGCCTCACAAGCACGTTCTCTC                              |
| P18 | FgJ03939 R (EcoRI) | ATATGGTGACCGAATTCCTAACACTTGCAAGGAAGTGGTC                    |
| P19 | 3939-Tadh1 GF      | CATAAATCATAAGAAATTCGCCTAACACTTGCAAGGAAGTGG                  |
| P20 | 3939-Pgal1-10 R    | GAAAATTCAATATAAGCCACCATGCCTCACAAGCACGTTCT                   |
| P21 | Pgal1-10-3939 F    | GTGAGGCATGGTGGCTTATATTGAATTTTCAAAAATTC                      |
| P22 | Pgal1-10-ERG20 R   | CTGAAGCCATGGTGGCTATAGTTTTTTCTCCTTGACG                       |
| P23 | ERG20-Pgal1-10 F   | GAGAAAAAATAAGTCCACCATGGCTTCAGAAAAAGAAATTAG                  |
| P24 | ERG20-Tcyc GR      | GTGACATAACTAATTACATGACTATTTGCTTCTCTTGTAAC                   |
| P25 | Tcyc-ERG20 GF      | GTTTACAAGAGAAGCAAATAGTCATGTAATTAGTTATGTCAC                  |
| P26 | Tadh1-3939 GR      | CCACTTCCTTGCAAGTGTTAGGCGAATTTCTTATGATTTATG                  |

**Table S2.** Strains and plasmids used in this research.

| Strains    | Relevant genotype                                                                                                          | Reference  |
|------------|----------------------------------------------------------------------------------------------------------------------------|------------|
| BL21 (DE3) | <i>E. coli B F dcm ompT hsdSB(rB<sup>-</sup>mB<sup>-</sup>)gal</i>                                                         | Invitrogen |
| CEN.PK2-1D | <i>Saccharomyces cerevisiae</i> MATalpha; his3D1; leu2-3_112; ura3-52; trp1-289; MAL2-8c; SUC2                             | EUROSCARF  |
| J1-012     | <i>Fusarium graminearum</i>                                                                                                | This work  |
| YZL141     | <i>S. cerevisiae</i> :: <i>pGAL10-tHMG1</i>                                                                                | This work  |
| T16        | <i>S. cerevisiae</i> :: <i>P<sub>GAL10</sub>-tHMG1</i> ; <i>P<sub>GAL10</sub>-FgJ03939</i> ; <i>P<sub>GALI</sub>-ERG20</i> | This work  |
| Plasmids   | Description                                                                                                                | Reference  |
| pZY141     | pRS426 derived, <i>TRP1</i> , <i>P<sub>GAL10</sub>-tHMG1-T<sub>ACT1</sub></i>                                              | This work  |
| pGB152     | pET28a derived, P <sub>T7</sub> : N-terminal his <sub>6</sub> -tag FgJ03939                                                | This work  |
| pGB315     | p426gal derived, <i>URA</i> , T <sub>CYC1</sub> -ERG20-P <sub>GALI</sub> -P <sub>GAL10</sub> -FgJ03939-T <sub>ADH1</sub>   | This work  |

382  
383

**Table S3.** Kinetic constants of FgJ03939 with GPP, FPP and GGPP.

| Substrate | FgJ03939                |                                      |                                                        |
|-----------|-------------------------|--------------------------------------|--------------------------------------------------------|
|           | $k_m$ [ $\mu\text{M}$ ] | $k_{\text{cat}}$ [ $\text{s}^{-1}$ ] | $k_{\text{cat}}/k_m$ [ $\text{M}^{-1} \text{s}^{-1}$ ] |
| GPP       | $9.9 \pm 1.23$          | $(17 \pm 0.4) \times 10^{-3}$        | $1.7 \times 10^3$                                      |
| FPP       | $16.396 \pm 3.277$      | $(94.5 \pm 9.1) \times 10^{-3}$      | $5.8 \times 10^3$                                      |
| GGPP      | $5.9257 \pm 1.559$      | $(16 \pm 1) \times 10^{-3}$          | $2.7 \times 10^3$                                      |

**Table S4.**  $^1\text{H}$  and  $^{13}\text{C}$  NMR data of compound **1** ( $\text{CDCl}_3$ , 400 MHz and 101 MHz).

| Position | $^{13}\text{C}$      | $^1\text{H}$         |           |                              |                  |                  |
|----------|----------------------|----------------------|-----------|------------------------------|------------------|------------------|
|          | $\delta(\text{ppm})$ | $\delta(\text{ppm})$ | Intensity | Multiplicity                 | HMBC correlation | COSY correlation |
| 1        | 25.11                | 2.72                 | 1H        | dd ( $J = 16.7$ ,<br>7.4 Hz) | 2, 3, 6, 7, 10   | H-1b, H-2        |
|          |                      | 2.48                 | 1H        | d ( $J = 16.9$ Hz)           |                  | H-1a             |
| 2        | 121.98               | 5.30                 | 1H        | m                            | 1, 4, 12         | H-1a             |
| 3        | 138.39               |                      |           |                              |                  |                  |
| 4        | 29.06                | 2.01                 | 1H        | m                            | 2, 3, 5, 10, 12  |                  |
|          |                      | 1.85                 | 1H        | m                            |                  | H-5b             |
| 5        | 38.29                | 1.59                 | 1H        | m                            | 3, 6, 10         |                  |
|          |                      | 1.52                 | 1H        | m                            |                  | H-4b             |
| 6        | 137.93               |                      |           |                              |                  |                  |
| 7        | 130.74               |                      |           |                              |                  |                  |
| 8        | 36.96                | 2.15                 | 2H        | m                            |                  | H-9b             |
| 9        | 28.13                | 1.81                 | 1H        | m                            |                  | H-9b             |
|          |                      | 1.32                 | 1H        | m                            | 8, 10, 11        | H-8, H-9a        |
| 10       | 57.72                |                      |           |                              |                  |                  |
| 11       | 33.34                | 1.81                 | 1H        | m                            |                  | H-14, H-15       |
| 12       | 26.88                | 1.63                 | 3H        | s                            | 2, 3, 4          |                  |
| 13       | 13.71                | 1.58                 | 3H        | s                            | 6, 7, 8          |                  |
| 14       | 17.96                | 0.68                 | 3H        | d ( $J = 6.8$ Hz)            | 10, 11, 15       | H-11             |
| 15       | 17.21                | 0.86                 | 3H        | d ( $J = 6.8$ Hz)            | 10, 11, 14       | H-11             |



385 **Table S5.**  $^1\text{H}$  and  $^{13}\text{C}$  NMR data of compound **2** ( $\text{CDCl}_3$ , 400 MHz and 101 MHz).

| Position | $^{13}\text{C}$      | $^1\text{H}$         |           |                    |                  |                    |
|----------|----------------------|----------------------|-----------|--------------------|------------------|--------------------|
|          | $\delta(\text{ppm})$ | $\delta(\text{ppm})$ | Intensity | Multiplicity       | HMBC correlation | COSY correlation   |
| 1        | 8.72                 | 0.39                 | 2H        | m                  | 2, 3, 6, 7, 10   | H-2                |
| 2        | 24.88                | 0.95                 | 1H        | m                  |                  | H-1                |
| 3        | 70.39                |                      |           |                    |                  |                    |
| 4        | 31.58                | 1.25                 | 1H        | d ( $J = 13.2$ Hz) | 2, 3, 10, 12     | H-4b, H-5 $\beta$  |
|          |                      | 1.08                 | 1H        | m                  |                  | H-4a, H-5 $\alpha$ |
| 5        | 32.93                | 1.66( $\beta$ )      | 1H        | m                  |                  | H-5 $\alpha$       |
|          |                      | 0.94( $\alpha$ )     | 1H        | m                  |                  | H-4b, H-5 $\beta$  |
| 6        | 37.67                |                      |           |                    |                  |                    |
| 7        | 40.42                | 1.79                 | 1H        | m                  | 2, 6, 8, 13      | H-8b, H-13         |
| 8        | 33.46                | 1.71                 | 1H        | m                  | 7, 9, 10         |                    |
|          |                      | 1.09                 | 1H        | m                  |                  | H-7                |
| 9        | 31.93                | 1.64                 | 1H        | m                  |                  | H-9b               |
|          |                      | 1.07                 | 1H        | m                  |                  | H-9a               |
| 10       | 43.56                |                      |           |                    |                  |                    |
| 11       | 30.21                | 1.62                 | 1H        | m                  | 9, 14, 15        | H-14, H-15         |
| 12       | 29.17                | 1.36                 | 3H        | s                  | 4, 3, 4          |                    |
| 13       | 14.3                 | 0.59                 | 3H        | d ( $J = 6.5$ Hz)  | 6, 7, 8          | H-7                |
| 14       | 18.02                | 0.90                 | 3H        | d ( $J = 6.7$ Hz)  | 10, 11, 15       | H-11               |
| 15       | 17.42                | 0.77                 | 3H        | d ( $J = 6.7$ Hz)  | 10, 11, 14       | H-11               |

**Table S6.**  $^1\text{H}$  and  $^{13}\text{C}$  NMR data of compound **3** ( $\text{CDCl}_3$ , 400 MHz and 101 MHz).

| Position | $^{13}\text{C}$      | $^1\text{H}$         |           |                         |                  |                  |
|----------|----------------------|----------------------|-----------|-------------------------|------------------|------------------|
|          | $\delta(\text{ppm})$ | $\delta(\text{ppm})$ | Intensity | Multiplicity            | HMBC correlation | COSY correlation |
| 1        | 9.60                 | 0.44                 | 1H        | dd ( $J = 9.9, 5.5$ Hz) | 2, 3, 6, 7, 10   | H-1b, H-2        |
|          |                      | 0.06                 | 1H        | d ( $J = 5.7$ Hz)       | 2, 3, 6, 7, 10   | H-1a, H-2        |
| 2        | 24.33                | 0.85                 | 1H        | m                       |                  | H-1              |
| 3        | 69.26                |                      |           |                         |                  |                  |
| 4        | 30.39                | 1.17                 | 1H        | m                       |                  | H-4b, H-5a       |
|          |                      | 1.07                 | 1H        | m                       | 5, 10            | H-4a             |
| 5        | 29.02                | 1.51                 | 1H        | m                       | 3, 4, 6          | H-4a             |
|          |                      | 1.18                 | 1H        | m                       |                  |                  |
| 6        | 34.41                |                      |           |                         |                  |                  |
| 7        | 40.36                | 1.81                 | 1H        | m                       | 2, 8             | H-13             |
| 8        | 33.54                | 1.73                 | 1H        | m                       | 7, 9, 10         | H-8b             |
|          |                      | 1.15                 | 1H        | m                       |                  | H-8a             |
| 9        | 32.17                | 1.66                 | 1H        | m                       | 5, 8, 10, 11     | H-9a             |
|          |                      | 1.13                 | 1H        | m                       |                  | H-9b             |
| 10       | 43.33                |                      |           |                         |                  |                  |
| 11       | 30.2                 | 1.52                 | 1H        | m                       | 5, 9, 10, 14, 15 | H-14, H-15       |
| 12       | 29.6                 | 1.24                 | 3H        | s                       | 2, 3, 4          |                  |
| 13       | 14.29                | 0.60                 | 3H        | d ( $J = 6.4$ Hz)       | 6, 7, 8          | H-7              |
| 14       | 17.71                | 0.88                 | 3H        | d ( $J = 6.7$ Hz))      | 10, 11, 15       | H-11             |
| 15       | 17.36                | 0.77                 | 3H        | d ( $J = 6.6$ Hz)       | 10, 11, 14       | H-11             |

**Table S7.**  $^1\text{H}$  and  $^{13}\text{C}$  NMR data of compound **8** ( $\text{CDCl}_3$ , 400 MHz and 101 MHz).

| Position | $^{13}\text{C}$      | $^1\text{H}$         |           |                                    |                  |                  |
|----------|----------------------|----------------------|-----------|------------------------------------|------------------|------------------|
|          | $\delta(\text{ppm})$ | $\delta(\text{ppm})$ | Intensity | Multiplicity                       | HMBC correlation | COSY correlation |
| 1        | 33.18                | 1.86                 | 1H        | m                                  | 2, 3             | H-2              |
|          |                      | 1.74                 | 1H        | m                                  |                  | H-2              |
| 2        | 120.6                | 5.34                 | 1H        | m                                  |                  | H-1a, H-1b       |
| 3        | 133.77               |                      |           |                                    |                  |                  |
| 4        | 28.07                | 2.01                 | 1H        | m                                  |                  | H-4b, H-5        |
|          |                      | 1.93                 | 1H        | m                                  |                  | H-4a, H-5        |
| 5        | 25.92                | 1.62                 | 2H        | m                                  | 1, 3, 4, 6, 7    | H-4              |
| 6        | 49.75                |                      |           |                                    |                  |                  |
| 7        | 39.85                | 2.0                  | 1H        | m                                  |                  | H-8a, H-13       |
| 8        | 37.67                | 2.41                 | 1H        | ddt ( $J = 15.8$ ,<br>6.7, 1.7 Hz) | 9, 10, 13        | H-7, H-8b, H-9   |
|          |                      | 1.71                 | 1H        | dt ( $J = 15.8$ , 2.8<br>Hz)       | 6, 7, 9, 10, 13  | H-8a, H-9        |
| 9        | 119.49               | 5.32                 | 1H        | m                                  | 6, 7, 8          | H-8a, H-8b       |
| 10       | 157.29               |                      |           |                                    |                  |                  |
| 11       | 26.18                | 2.17                 | 1H        | m                                  | 9, 10, 14, 15    | H-14, H-15       |
| 12       | 23.52                | 1.66                 | 3H        | brs                                | 2, 3, 4          |                  |
| 13       | 16.19                | 0.87                 | 3H        | d ( $J = 6.9$ Hz)                  | 6, 7, 8          | H-13             |
| 14       | 24.19                | 1.02                 | 3H        | d ( $J = 7.2$ Hz)                  | 10, 11, 15       | H-11             |
| 15       | 24.34                | 1.04                 | 3H        | d ( $J = 7.2$ Hz)                  | 10, 11, 14       | H-11             |

389

**Table S8.**  $^{13}\text{C}$  NMR data of  $^{13}\text{C}$ -labeled compound **1** ( $\text{CDCl}_3$ , 101 MHz).

| Position | $\delta(\text{ppm})$ | Enrichment | Isotope shift (ppm) |       |       |
|----------|----------------------|------------|---------------------|-------|-------|
| 1        | 25.11                | *          | -0.11               |       |       |
| 2        | 121.98               |            |                     |       |       |
| 3        | 138.39               | *          | -0.09               |       |       |
| 4        | 29.06                |            |                     |       |       |
| 5        | 38.29                | *          | None                |       |       |
| 6        | 137.93               |            |                     |       |       |
| 7        | 130.74               | *          | -0.08               |       |       |
| 8        | 36.96                |            |                     |       |       |
| 9        | 28.13                | *          | None                |       |       |
| 10       | 57.72                |            |                     |       |       |
| 11       | 33.34                | *          | -0.07               | -0.15 | -0.25 |
| 12       | 26.88                |            |                     |       |       |
| 13       | 13.71                |            |                     |       |       |
| 14       | 17.21                |            |                     |       |       |
| 15       | 17.96                |            |                     |       |       |

390

391

**Table S9.**  $^{13}\text{C}$  NMR data of  $^{13}\text{C}$ -labeled compound **8** ( $\text{CDCl}_3$ , 101 MHz).

| Position | $\delta(\text{ppm})$ | Enrichment | Isotope shift (ppm) |       |
|----------|----------------------|------------|---------------------|-------|
| 1        | 33.18                | *          | -0.13               |       |
| 2        | 120.6                |            |                     |       |
| 3        | 133.77               | *          | -0.08               |       |
| 4        | 28.07                |            |                     |       |
| 5        | 25.92                | *          | None                |       |
| 6        | 49.75                |            |                     |       |
| 7        | 39.85                | *          | -0.18               | -0.27 |
| 8        | 37.67                |            |                     |       |
| 9        | 119.49               | *          | None                |       |
| 10       | 157.29               |            |                     |       |
| 11       | 26.18                | *          | -0.14               | -0.22 |
| 12       | 23.52                |            |                     |       |
| 13       | 16.19                |            |                     |       |
| 14       | 24.19                |            |                     |       |
| 15       | 24.34                |            |                     |       |

392

# Coordinates and detailed data for quantum chemical calculations of compound 1.

Energy minimization of two conformations of **1** (**1a** and **1b**)

E(B3LYP-Aug-CC-pVDZ) = -586.08767

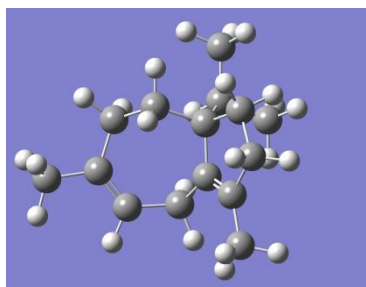

Standard orientation:

| Center<br>Number | Atomic<br>Number | Atomic<br>Type | Coordinates (Angstroms) |           |           |
|------------------|------------------|----------------|-------------------------|-----------|-----------|
|                  |                  |                | X                       | Y         | Z         |
| 1                | 6                | 0              | 0.715410                | -0.456567 | -0.350590 |
| 2                | 6                | 0              | 0.302078                | 0.844305  | 0.343414  |
| 3                | 6                | 0              | -2.171125               | 0.706989  | 0.889280  |
| 4                | 6                | 0              | 0.716214                | 3.368861  | 0.186909  |
| 5                | 6                | 0              | 1.686957                | -2.832758 | 0.000519  |
| 6                | 6                | 0              | 2.291002                | -1.007483 | 1.628828  |
| 7                | 6                | 0              | -4.071908               | -0.278131 | -0.365960 |
| 8                | 6                | 0              | 1.207855                | -1.535472 | 0.673196  |
| 9                | 6                | 0              | -0.474079               | -0.985389 | -1.202483 |
| 10               | 6                | 0              | -2.627236               | -0.253609 | 0.070152  |
| 11               | 6                | 0              | -0.753661               | 0.848448  | 1.420864  |
| 12               | 6                | 0              | 0.903592                | 1.926844  | -0.181224 |
| 13               | 6                | 0              | 1.859811                | 0.013354  | -1.308054 |
| 14               | 6                | 0              | 1.824941                | 1.559178  | -1.321804 |
| 15               | 6                | 0              | -1.766892               | -1.388854 | -0.464433 |
| 16               | 1                | 0              | -2.879276               | 1.470108  | 1.221720  |
| 17               | 1                | 0              | 0.034077                | 3.507567  | 1.033832  |
| 18               | 1                | 0              | 1.680384                | 3.835783  | 0.444544  |
| 19               | 1                | 0              | 0.311611                | 3.939279  | -0.665083 |
| 20               | 1                | 0              | 0.891181                | -3.329058 | -0.568561 |
| 21               | 1                | 0              | 2.525850                | -2.645319 | -0.684837 |

|     |    |   |   |           |           |           |
|-----|----|---|---|-----------|-----------|-----------|
| 426 | 22 | 1 | 0 | 2.037423  | -3.545872 | 0.759953  |
| 427 | 23 | 1 | 0 | 2.519701  | -1.763591 | 2.392705  |
| 428 | 24 | 1 | 0 | 3.229335  | -0.783357 | 1.102308  |
| 429 | 25 | 1 | 0 | 1.972917  | -0.092274 | 2.142799  |
| 430 | 26 | 1 | 0 | -4.554257 | -1.224173 | -0.069900 |
| 431 | 27 | 1 | 0 | -4.644912 | 0.551000  | 0.068087  |
| 432 | 28 | 1 | 0 | -4.151793 | -0.218307 | -1.463753 |
| 433 | 29 | 1 | 0 | 0.345079  | -1.802060 | 1.300762  |
| 434 | 30 | 1 | 0 | -0.128145 | -1.852991 | -1.781710 |
| 435 | 31 | 1 | 0 | -0.725047 | -0.207936 | -1.939460 |
| 436 | 32 | 1 | 0 | -0.688941 | 1.781205  | 1.994068  |
| 437 | 33 | 1 | 0 | -0.552727 | 0.041953  | 2.145543  |
| 438 | 34 | 1 | 0 | 1.735464  | -0.410815 | -2.312619 |
| 439 | 35 | 1 | 0 | 2.833623  | -0.332271 | -0.943802 |
| 440 | 36 | 1 | 0 | 2.826575  | 2.001872  | -1.200740 |
| 441 | 37 | 1 | 0 | 1.432128  | 1.959150  | -2.272494 |
| 442 | 38 | 1 | 0 | -1.532563 | -2.086531 | 0.355825  |
| 443 | 39 | 1 | 0 | -2.375427 | -1.971653 | -1.170864 |

444

445

446 E(B3LYP-Aug-CC-pVDZ) = -586.08988

447

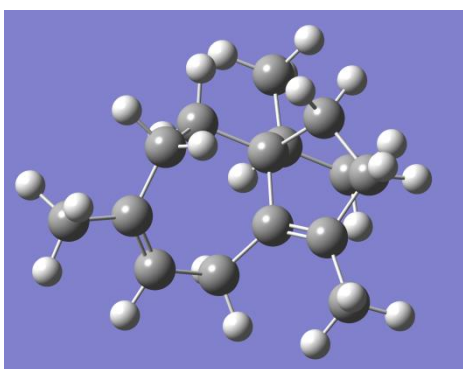

448

449

450 Standard orientation:

451

|     |        |        |        |                         |           |           |
|-----|--------|--------|--------|-------------------------|-----------|-----------|
| 452 | Center | Atomic | Atomic | Coordinates (Angstroms) |           |           |
| 453 | Number | Number | Type   | X                       | Y         | Z         |
| 454 | -----  |        |        |                         |           |           |
| 455 | 1      | 6      | 0      | -0.734267               | -0.507604 | 0.237073  |
| 456 | 2      | 6      | 0      | -0.114903               | 0.743956  | -0.384314 |
| 457 | 3      | 6      | 0      | 2.249775                | 0.203403  | -1.151359 |
| 458 | 4      | 6      | 0      | -0.114527               | 3.290063  | -0.084815 |

|     |       |   |   |           |           |           |
|-----|-------|---|---|-----------|-----------|-----------|
| 459 | 5     | 6 | 0 | -2.392071 | -2.459546 | -0.192911 |
| 460 | 6     | 6 | 0 | -2.935363 | -0.182484 | -1.107567 |
| 461 | 7     | 6 | 0 | 4.108884  | -0.738384 | 0.189821  |
| 462 | 8     | 6 | 0 | -1.798685 | -1.143811 | -0.725629 |
| 463 | 9     | 6 | 0 | 0.366649  | -1.560768 | 0.538059  |
| 464 | 10    | 6 | 0 | 2.643802  | -0.463408 | -0.054363 |
| 465 | 11    | 6 | 0 | 0.844455  | 0.626998  | -1.538243 |
| 466 | 12    | 6 | 0 | -0.496058 | 1.875566  | 0.234921  |
| 467 | 13    | 6 | 0 | -1.367894 | 0.055100  | 1.548538  |
| 468 | 14    | 6 | 0 | -1.443964 | 1.588983  | 1.379422  |
| 469 | 15    | 6 | 0 | 1.713512  | -0.996950 | 1.024949  |
| 470 | 16    | 1 | 0 | 3.024436  | 0.504384  | -1.862669 |
| 471 | 17    | 1 | 0 | 0.552508  | 3.365367  | -0.951306 |
| 472 | 18    | 1 | 0 | -1.009410 | 3.900518  | -0.287547 |
| 473 | 19    | 1 | 0 | 0.394309  | 3.759131  | 0.772654  |
| 474 | 20    | 1 | 0 | -1.629934 | -3.231487 | -0.033764 |
| 475 | 21    | 1 | 0 | -2.923883 | -2.306536 | 0.757420  |
| 476 | 22    | 1 | 0 | -3.119977 | -2.862001 | -0.911561 |
| 477 | 23    | 1 | 0 | -3.580727 | -0.644609 | -1.867338 |
| 478 | 24    | 1 | 0 | -3.571707 | 0.053213  | -0.242720 |
| 479 | 25    | 1 | 0 | -2.554042 | 0.760324  | -1.517971 |
| 480 | 26    | 1 | 0 | 4.303137  | -1.822111 | 0.238427  |
| 481 | 27    | 1 | 0 | 4.743802  | -0.307383 | -0.594556 |
| 482 | 28    | 1 | 0 | 4.428440  | -0.320512 | 1.158649  |
| 483 | 29    | 1 | 0 | -1.257332 | -1.390848 | -1.653666 |
| 484 | 30    | 1 | 0 | 0.555047  | -2.163439 | -0.363273 |
| 485 | 31    | 1 | 0 | -0.014661 | -2.257211 | 1.297937  |
| 486 | 32    | 1 | 0 | 0.917752  | 1.591370  | -2.060176 |
| 487 | 33    | 1 | 0 | 0.445845  | -0.074972 | -2.291995 |
| 488 | 34    | 1 | 0 | -0.718668 | -0.187764 | 2.400225  |
| 489 | 35    | 1 | 0 | -2.344329 | -0.394793 | 1.764855  |
| 490 | 36    | 1 | 0 | -2.462702 | 1.935170  | 1.135559  |
| 491 | 37    | 1 | 0 | -1.151467 | 2.126559  | 2.295183  |
| 492 | 38    | 1 | 0 | 2.247278  | -1.803543 | 1.549712  |
| 493 | 39    | 1 | 0 | 1.550215  | -0.215508 | 1.786445  |
| 494 | ----- |   |   |           |           |           |
